# Supplementary material for: Validation of a simplified score for predicting latent rheumatic heart disease progression using a prospective cohort of Brazilian schoolchildren
Source: PubMed Central journal article supplement — BMJ Open. 2020 May 10;10(5):e036827. doi: 10.1136/bmjopen-2020-036827 (PMC7223287; doi:10.1136/bmjopen-2020-036827), 2020-05-10
Supplement: bmjopen-2020-036827.draft_revisions.pdf [file bmjopen-2020-036827.draft_revisions.pdf]

# BMJ Open

BMJ Open is committed to open peer review. As part of this commitment we make the peer review history of every article we publish publicly available.

When an article is published we post the peer reviewers' comments and the authors' responses online. We also post the versions of the paper that were used during peer review. These are the versions that the peer review comments apply to.

The versions of the paper that follow are the versions that were submitted during the peer review process. They are not the versions of record or the final published versions. They should not be cited or distributed as the published version of this manuscript.

BMJ Open is an open access journal and the full, final, typeset and author-corrected version of record of the manuscript is available on our site with no access controls, subscription charges or pay-per-view fees (<http://bmjopen.bmj.com>).

If you have any questions on BMJ Open's open peer review process please email [info.bmjopen@bmj.com](mailto:info.bmjopen@bmj.com)

# BMJ Open

## Outcomes of Echocardiography-detected Rheumatic Heart Disease: Validating a Simplified Score in Brazilian Schoolchildren

|                               |                                                                                                                                                                                                                                                                                                                                                                                                                                                                                                                                                                                                                                                                                                                                                                                                                                                                                                                                                                                                                                                                                                                                                                                                                                                                                                                                                                                                                                                                                                                                                                                                                                                                                                                                                                                                                                                                                                                                                                                                                                                                                                                                                                                                                                                                                                                                                                                                                                                                                                     |
|-------------------------------|-----------------------------------------------------------------------------------------------------------------------------------------------------------------------------------------------------------------------------------------------------------------------------------------------------------------------------------------------------------------------------------------------------------------------------------------------------------------------------------------------------------------------------------------------------------------------------------------------------------------------------------------------------------------------------------------------------------------------------------------------------------------------------------------------------------------------------------------------------------------------------------------------------------------------------------------------------------------------------------------------------------------------------------------------------------------------------------------------------------------------------------------------------------------------------------------------------------------------------------------------------------------------------------------------------------------------------------------------------------------------------------------------------------------------------------------------------------------------------------------------------------------------------------------------------------------------------------------------------------------------------------------------------------------------------------------------------------------------------------------------------------------------------------------------------------------------------------------------------------------------------------------------------------------------------------------------------------------------------------------------------------------------------------------------------------------------------------------------------------------------------------------------------------------------------------------------------------------------------------------------------------------------------------------------------------------------------------------------------------------------------------------------------------------------------------------------------------------------------------------------------|
| Journal:                      | <i>BMJ Open</i>                                                                                                                                                                                                                                                                                                                                                                                                                                                                                                                                                                                                                                                                                                                                                                                                                                                                                                                                                                                                                                                                                                                                                                                                                                                                                                                                                                                                                                                                                                                                                                                                                                                                                                                                                                                                                                                                                                                                                                                                                                                                                                                                                                                                                                                                                                                                                                                                                                                                                     |
| Manuscript ID                 | bmjopen-2020-036827                                                                                                                                                                                                                                                                                                                                                                                                                                                                                                                                                                                                                                                                                                                                                                                                                                                                                                                                                                                                                                                                                                                                                                                                                                                                                                                                                                                                                                                                                                                                                                                                                                                                                                                                                                                                                                                                                                                                                                                                                                                                                                                                                                                                                                                                                                                                                                                                                                                                                 |
| Article Type:                 | Original research                                                                                                                                                                                                                                                                                                                                                                                                                                                                                                                                                                                                                                                                                                                                                                                                                                                                                                                                                                                                                                                                                                                                                                                                                                                                                                                                                                                                                                                                                                                                                                                                                                                                                                                                                                                                                                                                                                                                                                                                                                                                                                                                                                                                                                                                                                                                                                                                                                                                                   |
| Date Submitted by the Author: | 07-Jan-2020                                                                                                                                                                                                                                                                                                                                                                                                                                                                                                                                                                                                                                                                                                                                                                                                                                                                                                                                                                                                                                                                                                                                                                                                                                                                                                                                                                                                                                                                                                                                                                                                                                                                                                                                                                                                                                                                                                                                                                                                                                                                                                                                                                                                                                                                                                                                                                                                                                                                                         |
| Complete List of Authors:     | <p>Bechtluft, Bárbara; Hospital das Clínicas da Universidade Federal de Minas Gerais, Serviço de Cardiologia e Cirurgia Cardiovascular<br/> Nascimento, Bruno; Universidade Federal de Minas Gerais, Serviço de Cardiologia e Cirurgia Cardiovascular<br/> Sable, Craig ; Children's National Health System Washington, Cardiology<br/> Fraga, Clara; Hospital das Clínicas da Universidade Federal de Minas Gerais, Serviço de Cardiologia e Cirurgia Cardiovascular<br/> Barbosa, Márcia; Hospital das Clínicas da Universidade Federal de Minas Gerais, Serviço de Cardiologia e Cirurgia Cardiovascular<br/> Reis, Susana; Hospital das Clínicas da Universidade Federal de Minas Gerais, Serviço de Cardiologia e Cirurgia Cardiovascular<br/> Diamantino, Adriana; Hospital das Clínicas da Universidade Federal de Minas Gerais, Serviço de Cardiologia e Cirurgia Cardiovascular<br/> Meira, Zilda Maria; Hospital das Clínicas da Universidade Federal de Minas Gerais, Serviço de Cardiologia e Cirurgia Cardiovascular<br/> Castilho, Sandra Regina; Hospital das Clínicas da Universidade Federal de Minas Gerais, Serviço de Cardiologia e Cirurgia Cardiovascular<br/> Arantes, Nayana; Hospital das Clínicas da Universidade Federal de Minas Gerais, Serviço de Cardiologia e Cirurgia Cardiovascular<br/> Oliveira, Kaciane; Hospital das Clínicas da Universidade Federal de Minas Gerais, Serviço de Cardiologia e Cirurgia Cardiovascular<br/> Silva, José Luiz; Universidade Federal de Minas Gerais, Departamento de Estatística<br/> Resende, Breno; Hospital das Clínicas da Universidade Federal de Minas Gerais, Serviço de Cardiologia e Cirurgia Cardiovascular<br/> Costa, Waydder Antônio; Hospital das Clínicas da Universidade Federal de Minas Gerais, Serviço de Cardiologia e Cirurgia Cardiovascular<br/> Mata, Mariana; Hospital das Clínicas da Universidade Federal de Minas Gerais, Serviço de Cardiologia e Cirurgia Cardiovascular<br/> Pereira, Augusto; Hospital das Clínicas da Universidade Federal de Minas Gerais, Serviço de Cardiologia e Cirurgia Cardiovascular<br/> Ribeiro, Antonio Luiz; Hospital das Clínicas da Universidade Federal de Minas Gerais, Serviço de Cardiologia e Cirurgia Cardiovascular<br/> Beaton, Andrea; Cincinnati Children's Hospital Medical Center, Cardiology<br/> Pereira Nunes, Maria Carmo; Hospital das Clínicas da Universidade Federal de Minas Gerais, Serviço de Cardiologia e Cirurgia Cardiovascular</p> |
| Keywords:                     | Paediatric rheumatology < PAEDIATRICS, Echocardiography < CARDIOLOGY, Paediatric cardiology < CARDIOLOGY, Ultrasound <                                                                                                                                                                                                                                                                                                                                                                                                                                                                                                                                                                                                                                                                                                                                                                                                                                                                                                                                                                                                                                                                                                                                                                                                                                                                                                                                                                                                                                                                                                                                                                                                                                                                                                                                                                                                                                                                                                                                                                                                                                                                                                                                                                                                                                                                                                                                                                              |

1  
2  
3  
4  
5  
6  
7  
8  
9  
10  
11  
12  
13  
14  
15  
16  
17  
18  
19  
20  
21  
22  
23  
24  
25  
26  
27  
28  
29  
30  
31  
32  
33  
34  
35  
36  
37  
38  
39  
40  
41  
42  
43  
44  
45  
46  
47  
48  
49  
50  
51  
52  
53  
54  
55  
56  
57  
58  
59  
60

|  |                                                                   |
|--|-------------------------------------------------------------------|
|  | RADIOLOGY & IMAGING, Cardiovascular imaging < RADIOLOGY & IMAGING |
|  |                                                                   |

SCHOLARONE™  
Manuscripts

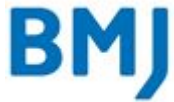

I, the Submitting Author has the right to grant and does grant on behalf of all authors of the Work (as defined in the below author licence), an exclusive licence and/or a non-exclusive licence for contributions from authors who are: i) UK Crown employees; ii) where BMJ has agreed a CC-BY licence shall apply, and/or iii) in accordance with the terms applicable for US Federal Government officers or employees acting as part of their official duties; on a worldwide, perpetual, irrevocable, royalty-free basis to BMJ Publishing Group Ltd ("BMJ") its licensees and where the relevant Journal is co-owned by BMJ to the co-owners of the Journal, to publish the Work in this journal and any other BMJ products and to exploit all rights, as set out in our [licence](#).

The Submitting Author accepts and understands that any supply made under these terms is made by BMJ to the Submitting Author unless you are acting as an employee on behalf of your employer or a postgraduate student of an affiliated institution which is paying any applicable article publishing charge ("APC") for Open Access articles. Where the Submitting Author wishes to make the Work available on an Open Access basis (and intends to pay the relevant APC), the terms of reuse of such Open Access shall be governed by a Creative Commons licence – details of these licences and which [Creative Commons](#) licence will apply to this Work are set out in our licence referred to above.

Other than as permitted in any relevant BMJ Author's Self Archiving Policies, I confirm this Work has not been accepted for publication elsewhere, is not being considered for publication elsewhere and does not duplicate material already published. I confirm all authors consent to publication of this Work and authorise the granting of this licence.

## Outcomes of Echocardiography-detected Rheumatic Heart Disease: Validating a Simplified Score in Brazilian Schoolchildren

Bárbara M F Bechtluft, MD<sup>1,2</sup>, Bruno R Nascimento, MD, MSc, PhD, FACC<sup>1,2</sup>, Craig A Sable, MD<sup>3</sup>, Clara L Fraga, MD<sup>1</sup>, Márcia M Barbosa, MD, PhD<sup>1</sup>, Susana D P Reis, MD<sup>1</sup>, Adriana C. Diamantino<sup>1</sup>, MD, MSc<sup>4</sup>, Zilda Maria A Meira, MD, PhD<sup>1,2</sup>, Sandra Regina T Castilho, MD, MSc<sup>1,2</sup>, Nayana F Arantes, MD, MSc<sup>1</sup>, Kaciane K B Oliveira, BSN, MSc<sup>1</sup>, Jose Luiz Padilha da Silva, PhD<sup>4</sup>, Breno D F Rezende, MD<sup>2</sup>, Waydder Antônio A. Costa, MD<sup>2</sup>, Mariana D O Mata, MD<sup>2</sup>, Augusto F C Pereira, MD<sup>2</sup>, Antonio Luiz P Ribeiro, MD, PhD<sup>1,2</sup>, Andrea Z Beaton, MD<sup>6</sup>, Maria Carmo P Nunes, MD, PhD<sup>1</sup>.

On behalf of the PROVAR (*Programa de Rastreamento da Valvopatia Reumática*) investigators.

<sup>1</sup> Serviço de Cardiologia e Cirurgia Cardiovascular e Centro de Telessaúde do Hospital das Clínicas da UFMG, Belo Horizonte - MG, Brazil; <sup>2</sup> Faculdade de Medicina da Universidade Federal de Minas Gerais, Belo Horizonte - MG, Brazil; <sup>3</sup> Children's National Health System, Washington – DC, United States; <sup>4</sup> FIPMoc University Center, Montes Claros, Minas Gerais, Brazil; <sup>5</sup> Department of Statistics, Universidade Federal do Paraná, Curitiba - PR, Brazil; <sup>6</sup> The Heart Institute, Cincinnati Childrens Hospital Medical Center, and the University of Cincinnati School of Medicine, Cincinnati - OH, United States.

This study was funded by Edwards Lifesciences Foundation, USA.

The funder did not have any relationship with the conduct of the study, the collection, analysis, and interpretation of the data, and the preparation, review, or approval of this manuscript.

Corresponding author:

Bruno Ramos Nascimento, MD, MSc, PhD, FACC

Hospital das Clínicas da Universidade Federal de Minas Gerais

Rua Muzambinho 710/802, Serra

Belo Horizonte, Minas Gerais, Brasil, CEP 30.210-530

Tel.: +55 31 3307 9437; Fax: +55 31 32847298.

**Abstract:**

**Objectives:** Echocardiographic (echo) screening is an important tool to estimate rheumatic heart disease (RHD) prevalence, but the natural history of screen-detected RHD remains unclear. The aim of this study was to assess the accuracy of the simplified score using the WHF criteria in predicting mid-term RHD outcomes in Brazilian schoolchildren. We present mid-term follow-up of patients with subclinical RHD from the PROVAR study, which uses non-experts, telemedicine and portable echo to screen for RHD.

**Setting:** Public schools of underserved areas and private schools in Minas Gerais, southeast Brazil.

**Participants:** Total 197 patients (170 borderline and 27 definite RHD) with follow-up of 29±9 months were included. Median age was 14 (12–16) years, and 130 (66%) were female. Only 4 patients in the definite group were regularly receiving penicillin.

**Primary and secondary outcome measures:** Unfavorable outcome was based on the 2-years follow-up echo, defined as worsening diagnostic category, remaining with mild definite RHD or development/worsening of valve regurgitation/stenosis.

**Results:** Among patients with borderline RHD, 29 (17.1%) progressed to definite, 49 (28.8%) remained stable, 86 (50.6%) regressed to normal and 6 (3.5%) were reclassified as other heart diseases. Among those with definite RHD, 13 (48.1%) remained in the category, while 5 (18.5%) regressed to borderline, 5 (18.5%) regressed to normal and 4 (14.8%) were reclassified as other heart disease. The simplified echo score was a significant predictor of RHD unfavorable outcome (hazard ratio [HR] 1.197, 95% confidence interval 1.098-1.305,  $p<0.001$ ).

**Conclusion:** The simple risk score provided an accurate prediction of RHD status at 2-year follow-up, showing a good performance in Brazilian schoolchildren, with a potential

1  
2  
3 value for risk stratification and monitoring of echocardiography-detected RHD.  
4

5 **Trial registration:** N/A.  
6  
7  
8  
9

10 **Key-words:** Rheumatic heart disease; screening; echocardiography; follow-up;  
11  
12 prognosis.  
13

14 **Word count:** 2,341  
15  
16  
17

18  
19 **Strengths and limitations of this study:**  
20

- 21
- 22 • PROVAR is the first longitudinal program evaluating the impact of  
23 echocardiographic screening in Latin America and the mid-term prognosis of  
24 subclinical RHD in the Brazilian context.  
25
  - 26 • Unprecedented follow-up data from Latin America data suggest that screen-  
27 detected RHD in Brazil is not benign: patients with definite RHD are likely to  
28 remain in this category (48.1%), while progression rates of borderline disease are  
29 considerable (17.1%).  
30
  - 31 • A newly developed five-component point-based echo score showed considerable  
32 accuracy in this population for discriminating children at risk for unfavorable echo  
33 outcome at 2 years.  
34
  - 35 • The program had low-participation and high attrition: 40% of students consented  
36 to school-based screening and only 36% of screen-positive children were enrolled  
37 in follow-up.  
38
  - 39 • No child progressed to clinically significant RHD, suggesting the progression  
40 timeline may be longer in the Brazilian context and limiting further conclusions  
41 on the long-time prognosis of subclinical RHD.  
42  
43  
44  
45  
46  
47  
48  
49  
50  
51  
52  
53  
54  
55  
56  
57  
58  
59  
60

**Article summary:**

- PROVAR is the first Rheumatic Heart Disease (RHD) screening program in Brazil.
- Here we present mid-term follow-up of Brazilian schoolchildren with subclinical RHD.
- Half of patients with definite RHD are likely to remain in this category (48.1%)
- Over half of patients with borderline RHD regressed to normal and 17.1% progressed.
- A simplified 5-variable echo score was a powerful predictor of unfavorable outcome.

**Authors e-mails:**

Bárbara Bechtluft (*bm.fernandes@icloud.com*), Bruno Nascimento (*ramosnas@gmail.com*), Craig Sable (*csable@childrensnational.org*), Clara Fraga (*clara-leal@hotmail.com*), Márcia Barbosa (*marciamelobarbosa@gmail.com*), Susana Reis (*susanadpreis@hotmail.com*), Adriana Diamantino (*dri\_diamantino@yahoo.com.br*), Zilda Maria Meira (*zilda.m.a.meira@gmail.com*), Sandra Regina Castilho (*srt.castilho@gmail.com*), Nayana Arantes (*nayanaflamini@yahoo.com.br*), Kaciane Oliveira (*kacianebruno@hotmail.com*), Jose Luiz Silva (*jlpadilha@yahoo.com.br*), Breno Rezende (*brenodfr@gmail.com*), Waydder Antônio Costa (*wayddera@gmail.com*), Mariana Mata (*marianadoliveira@hotmail.com*), Augusto Pereira (*augustofcp@hotmail.com*), Antonio Luiz Ribeiro (*tom1963br@yahoo.com.br*), Andrea Beaton (*andrea.beaton@cchmc.org*), Maria Carmo Nunes (*mcarmo@waymail.com.br*).



## Introduction

Rheumatic heart disease (RHD) is the major cause of acquired cardiovascular disease in children and young adults worldwide. Its global burden is noteworthy, affecting 39 million people and causing 319,400 deaths annually<sup>1 2</sup>. The disease is more prevalent in low and middle-income countries and it's still mostly diagnosed in advanced stages of the disease, in symptomatic patients<sup>1</sup>. Thus, the latent period between the first episode of acute rheumatic fever (ARF) and cardiovascular symptoms is not being readily identified nor used as an opportunity to implement early interventions.

In this context, echocardiographic screening in endemic areas has emerged as an effective approach to identify patients in early, subclinical stages of RHD<sup>3-6</sup>. Diagnostic criteria for subclinical RHD— asymptomatic patients with echocardiographic findings suggestive of RHD without history of ARF – have been standardized by the World Heart Federation (WHF) consensus in 2012. Three categories are defined: definite, borderline and normal<sup>7</sup>. The morphological findings of RHD and the criteria for pathologic valve regurgitation are also established. This standardization allowed for comparison between studies carried out in different populations.

Although criteria are standardized, prognosis and natural history of latent RHD, and the impact of clinical interventions – such as secondary prophylaxis – still require further evaluation. The first studies that evaluated the follow-up of patients with subclinical RHD have several limitations, including relatively short follow-up times, small sample size and lack of standardized criteria for echocardiographic and clinical progression<sup>8</sup>. However, data suggests that RHD progression in children with latent RHD is not negligible<sup>9</sup>. Therefore, we aimed to assess the mid-term evolution of Brazilian schoolchildren (5-18 years) with subclinical RHD findings observed in echocardiographic screening<sup>4 5 10</sup> and to assess the performance of a simplified score

1  
2  
3 developed by Nunes *et al*<sup>9</sup>, consisting of 5 components of the WHF criteria, as a predictor  
4  
5 of unfavorable echocardiographic outcomes.  
6  
7  
8  
9

## 10 **Methods:**

11  
12 This is a prospective cohort study with systematic clinical and echocardiographic  
13 follow-up of children with subclinical RHD. It was derived from a RHD screening  
14 program, established in Brazil in 2014 - the PROVAR+ (*Programa de Rastreamento da*  
15 *Valvopatia Reumática*) study - a collaboration between the Children's National Health  
16 System, Washington – DC, US, the Universidade Federal de Minas Gerais and the  
17 Telehealth Network of Minas Gerais<sup>11</sup>, Belo Horizonte, Minas Gerais, Brazil. This  
18 screening program has already screened more than 12,000 children and adolescents from  
19 21 schools in Minas Gerais, Brazil, between October 2014 and December 2016<sup>4 5 10</sup>. The  
20 study protocol conforms to the ethical guidelines of the 1975 Declaration of Helsinki and  
21 ethics approval was obtained from the institutional review boards of the participant  
22 institutions as well as from the local Boards of Health and Education.  
23  
24  
25  
26  
27  
28  
29  
30  
31  
32  
33  
34  
35  
36

37 In brief, public schools and primary care centers from low income areas of  
38 metropolitan Belo Horizonte, Brazil, were selected to participate in the screening  
39 program, based on socioeconomic data (Human Development Index (HDI)) and priorities  
40 of the health authorities. Selected private schools (2) were also invited in order to  
41 characterize RHD in high-income youth. All asymptomatic students, without history of  
42 ARF or RHD, were eligible for screening<sup>4 5</sup>. All participants were informed about the  
43 study and had the informed consent signed by their parents or by themselves, if in legal  
44 age.  
45  
46  
47  
48  
49  
50  
51  
52  
53  
54

55 The echocardiographic screening was performed from 2014 to 2016 by  
56 previously trained non-physicians (nurses and imaging technicians) and later uploaded to  
57  
58  
59  
60

1  
2  
3 dedicated cloud storage systems and interpreted through telemedicine by cardiologists in  
4  
5 Brazil and the US<sup>12</sup>, applying the WHF criteria. Detailed screening methodology has been  
6  
7 previously published<sup>4,5</sup>.  
8  
9

10 Participants with abnormal screening were invited for the UFMG Pediatric  
11  
12 Cardiology outpatient clinics, and were prospectively enrolled. All patients included in  
13  
14 the follow-up from Belo Horizonte had the baseline screening diagnosis confirmed by  
15  
16 standard echocardiography, scheduled in the University Hospital. The ones from Montes  
17  
18 Claros had the diagnosis based on consensus reads of VSCAN studies. Specific care of  
19  
20 these patients was left to the discretion of the caring cardiologist with experience in RHD.  
21  
22 Follow-up consisted of clinical examination by a pediatrician (BB, AD), with  
23  
24 standardized clinical history and physical examination, and standard echocardiogram by  
25  
26 an experienced pediatric cardiologist (SR) (Vivid IQ®, GE Healthcare, Milwaukee, WI,  
27  
28 USA), blinded to the findings of the previous exam, and based on the WHF criteria. A  
29  
30 standardized imaging protocol was applied. Patients were then reclassified by consensus  
31  
32 in the 4 pre-established categories. Specific care of these patients and indication of  
33  
34 secondary prophylaxis – not mandatory for any category – was left to the discretion of  
35  
36 the caring cardiologist (ZM, FA and MCN). All echo variables were systematically  
37  
38 collected in a dedicated online database.  
39  
40  
41  
42  
43  
44

45 The simplified echocardiographic score proposed by Nunes *et al*, consisting of 5  
46  
47 variables (mitral valve anterior leaflet thickening, excessive leaflet tip motion, and  
48  
49 regurgitation jet length  $\geq 2$  cm, and aortic valve focal thickening and any regurgitation)<sup>9</sup>  
50  
51 was applied to this population. Disease unfavorable outcome assessed by  
52  
53 echocardiogram was defined as worsening in diagnostic  
54  
55 category (borderline to definite), remaining with mild definite RHD  
56  
57 or worsening in the grade of mitral or aortic valve  
58  
59  
60

1  
2  
3 regurgitation or development/worsening grade of mitral  
4 stenosis. Favorable outcome was defined as disease regression – considered when an  
5 improvement in diagnostic category was observed or in case of reduction of regurgitation  
6 severity – or remaining with stable borderline disease.  
7  
8  
9  
10

### 11 ***Patient and public involvement***

12  
13  
14 The study participants were not involved in the design of this study. No patient  
15 involvement.  
16  
17

### 18 ***Data analysis and statistics***

19  
20  
21 Data were systematically entered to the RedCap® online database<sup>13</sup>. Statistical  
22 analysis was performed using SPSS® software version 23.0 for Mac OSX (SPSS Inc.,  
23 Chicago, Illinois). Continuous variables were expressed as mean ± standard deviation  
24 (SD) or as median and interquartile range (IQR, [Q1/Q3]) when appropriate. Categorical  
25 variables were expressed as absolute values and percentages. The between-group  
26 comparison (progression vs regression/stable) was performed using the Fisher's Exact  
27 Test for categorical variables.  
28  
29  
30  
31  
32  
33  
34  
35  
36

37  
38 The simplified echo score<sup>9</sup> was applied to this population of schoolchildren to  
39 assess its discrimination and calibration in predicting disease unfavorable outcome using  
40 logistic regression. The predictive value of the score was assessed as a time-dependent  
41 variable in the Cox proportional hazards model. RHD favorable outcome rates of the 3  
42 risk categories (low/intermediate/high) were estimated by the Kaplan–Meier method and  
43 compared by the log-rank test. A two-tailed significance level of 0.05 was considered  
44 statistically significant.  
45  
46  
47  
48  
49  
50  
51  
52  
53  
54  
55

### 56 **Results:**

57  
58 Total 197 patients were included, being 114 (36%) out of 317 children with  
59  
60

1  
2  
3 positive screening echos in Belo Horizonte and 83 (37%) of 224 in Montes Claros, with  
4  
5 a mean  $29\pm 9$  (range 11 to 48) months follow-up, considering the latest clinical visit. At  
6  
7 baseline, 170 (86.3%) had borderline and 27 (13.7%) definite RHD. Median age was 14.1  
8  
9 (IQR 12.0 – 16.2) years, and 130 (66%) were female. Belo Horizonte and Montes Claros  
10  
11 had similar rates of borderline (85.1% vs. 88.0%) and definite (14.9% vs. 12.0%) RHD  
12  
13 at baseline ( $p=0.56$ ). Only 13 (6.6%) patients were regularly receiving Penicillin (7 with  
14  
15  $<80\%$  adherence), 4 in the definite RHD group. Detailed baseline demographic and  
16  
17 echocardiographic characteristics are depicted in **Table 1**. Compared to the 344 patients  
18  
19 without follow-up, the study sample had similar baseline distribution of  
20  
21 borderline/definite diagnoses (86.3%/13.7% vs. 89.5%/10.5%,  $p=0.26$ ) as well as WHF  
22  
23 subgroups for borderline ( $p=0.27$ ) and definite ( $p=0.10$ ) RHD, human development index  
24  
25 (0.77 [IQR 0.76 – 0.80] vs. 0.77 [IQR 0.76 – 0.80],  $p=0.22$ , household (4 [IQR 4 – 5] vs.  
26  
27 4 [IQR 4 – 6] inhabitants,  $p=0.25$ ) and age (14.2 [IQR 12.0 – 16.2] vs. 14.1 [IQR 11.8 –  
28  
29 15.8] years,  $p=0.46$ ), but a slightly higher proportion of females (66.3% vs. 57.0%,  
30  
31  $p=0.03$ ) was observed.  
32  
33  
34  
35  
36

37  
38 Cardiovascular symptoms were reported by 69 (35%) patients in the follow-up  
39  
40 visits, including dyspnea (15.2%) and palpitations (14.2%). However, clinical evaluation,  
41  
42 physical examination, and echocardiograms did not support a cardiac etiology of these  
43  
44 symptoms. During follow-up, at least 1 episode of pharyngitis was reported by 92  
45  
46 patients, being 62 (67%) adequately treated in primary care, as informed by patients or  
47  
48 parents.  
49  
50

51  
52 Among patients with borderline RHD, 29 (17.1%) progressed to definite RHD, 49  
53  
54 (28.8%) remained stable, 86 (50.6%) regressed to normal and 6 (3.5%) were reclassified  
55  
56 as other heart diseases. Among those with definite RHD, 13 (48.1%) remained in the  
57  
58 category, while 5 (18.5%) regressed to borderline, 5 (18.5%) regressed to normal and 4  
59  
60

(14.8%) were reclassified as other heart disease (**Figure 1**). No patients had worsening grade of mitral or aortic regurgitation or development/worsening grade of mitral stenosis.

Among borderline patients who progressed, 26 (89.7%) had mitral regurgitation (MR), 2 had aortic regurgitation and 14 (48.3%) had at least 1 morphological abnormality of the mitral valve as the initial criteria. At follow-up, 12 patients developed morphological abnormalities of the mitral (N=10) and aortic (N=4) valves. No patients developed ventricular dysfunction or enlargement (**Table 2**).

### **Predictive Performance of the simplified echocardiographic score**

The simplified score, based on components of the WHF criteria, was a significant predictor of RHD unfavorable outcome (hazard ratio [HR] 1.197, 95% confidence interval [CI] 1.098 - 1.305,  $p < 0.001$ ). The discrimination of the score was good (C-statistic=0.714, 95% CI 0.627 - 0.801) and the model was well calibrated (**Appendix Figure 1**). A Hosmer-Lemeshow  $p = 0.589$  confirmed no significant difference between observed and predicted unfavorable outcome (**Appendix Figure 2, A and B**).

The score classified 121 children in low risk, 48 in the intermediate risk, and 28 in the high-risk groups. Additionally, the score model was able to separate low-, intermediate- and high-risk categories for disease unfavorable outcome (**Figure 2**). Favorable outcome RHD risk rate in the low-risk children at 1-, and 2-years follow-up was 99%, and 97% respectively, compared to 76%, and 47% in the high-risk group.

### **Discussion:**

In agreement with growing international data<sup>8</sup>, subclinical RHD in Brazil has a variable outcome. Approximately 1 in 5 children with borderline RHD progressed to definite RHD and more than 1 in 3 children with definite RHD remained in this category.

1  
2  
3 A recently developed risk stratification score<sup>9</sup> was a modest, but significant, predictor of  
4 unfavorable echocardiographic outcome in our population.  
5  
6

7  
8 Since its inception, the PROVAR research program has been studying the use of  
9 echocardiography to improve the early detection of RHD<sup>12</sup> in Brazil. Epidemiologically  
10 characterization of RHD prevalence, and study of portable and handheld devices, task-  
11 shifting, and telemedicine have been undertaken to understand how to improve diagnostic  
12 access in low-resource populations in Brazil<sup>4 10 12 14</sup>. Determining outcomes for children  
13 with subclinical RHD is a critical next step to inform program evaluation, as for other  
14 screening programs worldwide. These data, with a mean follow-up of 29-months, show  
15 that both borderline and definite RHD are dynamic phenotypes, with borderline RHD  
16 showing more favorable outcomes<sup>6 8 15</sup>.  
17  
18  
19  
20  
21  
22  
23  
24  
25  
26  
27

28  
29 Nearly half (46%) of the youth in this program improved echocardiographically  
30 to normal, similar to global rates ranging from 47-67%<sup>8 16</sup>. Yet borderline RHD was not  
31 a benign finding, with one in five (17%) of children progressing to definite RHD, in line  
32 with global data which has reported 17-23% progression at 2.5-7.5 years of follow-up<sup>8 17</sup>  
33  
34  
35  
36  
37  
38  
39  
40  
41  
42  
43  
44  
45  
46  
47  
48  
49  
50  
51  
52  
53  
54  
55  
56  
57  
58  
59  
60  
18. Children with definite RHD at diagnosis had more unfavorable outcomes with 40%  
remaining definite, though no child progressed to moderate or severe RHD, reflecting a  
mildly phenotype in screen-detected RHD in Brazilian youth compared to global data<sup>8 15</sup>  
<sup>17 19 20</sup>. This milder phenotype may reflect the relatively stronger public health system in  
Brazil, compared to many other RHD-endemic areas, facilitating higher rates of sore  
throat and rheumatic fever diagnoses, but more data are needed. The impact of secondary  
prophylaxis in this cohort cannot be determined, as few were prescribed prophylaxis and  
adherence was not well captured, and we await the results of a large randomized clinical  
trial on the impact of penicillin prophylaxis in screen-detected youth, currently ongoing  
in Uganda (*Gwoko Adunu pa Lutino*; clinicaltrials.gov No. NCT03346525).

1  
2  
3 The most novel aspect of this follow-up study was the application of a newly  
4 developed score to predict unfavorable outcome among children with screen-detected  
5 RHD<sup>9</sup>. Addressing the need to simplify the WHF criteria and improve the applicability  
6 for use with handheld echocardiography (lacking spectral Doppler), Nunes et al  
7 developed a five-component point-based score that showed considerable accuracy for  
8 predicting disease progression in two large African cohorts<sup>9</sup>. The score showed modest  
9 discrimination for unfavorable outcome in our population, potentially related to the less  
10 aggressive RHD phenotype in Brazil as compared to African cohorts<sup>8 19</sup>, suggesting wider  
11 external validation and recalibration may be necessary for global application. However,  
12 still in a population with a relatively low risk of progression – especially to clinically  
13 significant disease – its discrimination of subgroups at higher risk of unfavorable  
14 echocardiographic outcome point towards an useful public health tool, and urges further  
15 investigations.

16  
17  
18  
19  
20  
21  
22  
23  
24  
25  
26  
27  
28  
29  
30  
31  
32  
33 The PROVAR program has encountered several context-specific limitations and  
34 lessons learned. First, the program has struggled with low-participation and high attrition  
35 compared to other global populations: only 40% of students have consented to school-  
36 based screening<sup>5</sup> and only 36% of screen-positive children from the schools were enrolled  
37 in follow-up. Much higher rates of follow-up were seen in primary healthcare screening  
38 (84.4%<sup>5</sup>), suggesting this location is more appropriate in our context. Second, absent a  
39 gold standard, initiation of penicillin prophylaxis was left to the discretion of the treating  
40 physician. Low rates of prescription were seen compared to those reported globally,  
41 suggesting the need for widespread provider education based on the results from the  
42 GOAL study (*Gwoko Adunu pa Lutino*; clinicaltrials.gov No. NCT03346525). Finally,  
43 no child progressed to clinically significant RHD, suggesting the timeline of progression  
44 may be longer in the Brazilian context. This may have important implications on when to  
45  
46  
47  
48  
49  
50  
51  
52  
53  
54  
55  
56  
57  
58  
59  
60



1  
2  
3 screen and cost-effectiveness evaluations. Despite these limitations, the PROVAR  
4  
5 program is the only longitudinal program evaluating the impact of echocardiographic  
6  
7 screening in Latin America.  
8  
9

### 10 11 12 **Conclusion:**

13  
14 These data suggest that screen-detected RHD in Brazil is not benign; patients with  
15  
16 definite RHD are likely to remain in this category, and progression rates of borderline  
17  
18 RHD are not negligible. The simplified echocardiography score<sup>9</sup> assessed in an  
19  
20 independent population with predominantly low-risk for RHD progression was accurate  
21  
22 to predict early disease unfavorable outcome. Additional investigations are needed to  
23  
24 establish the long-term prognosis of subclinical RHD, and the effects of prophylaxis in  
25  
26 high-risk subgroups.  
27  
28  
29  
30  
31  
32

### 33 **Conflicts of interest:**

34  
35 The authors have no conflicts of interest to declare regarding this manuscript.  
36  
37  
38  
39

### 40 **Author contributions:**

41  
42 Conception and design of the research: Bechtluft, BMF, Nascimento, BR, Sable,  
43  
44 C, Beaton, AZ, Nunes, MCP, Ribeiro, AL; Acquisition of data: Bechtluft, BMF, Fraga,  
45  
46 CL, Barbosa, MM, Reis, SDP, Meira, ZMA, Castilho, SRT, Arantes, NF, Oliveira, KKB,  
47  
48 Castro, L, Rezende, BDF, Costa, WAA, Mata, MDO, Pereira, AFC; Analysis and  
49  
50 interpretation of data: Nascimento, BR, Nunes, MCP, Sable, C, Beaton, AZ, Reis, SDP,  
51  
52 Meira, ZMA, Castilho, SRT, Arantes, NF; Statistical analysis: Nascimento, BR, Ribeiro,  
53  
54 AL, Sable, C; Obtaining financing: Beaton, AZ, Sable, C, Nascimento, BR; Writing of  
55  
56 the manuscript: Bechtluft, BMF, Nascimento, BR, Sable, C, Nunes, MCP; Critical  
57  
58  
59  
60

1  
2  
3 revision of the manuscript for intellectual content: All authors; Authors responsible for  
4 the overall content as guarantors: Bechtluft, BMF, Nascimento, BR, Beaton, AZ,  
5  
6  
7  
8  
9  
10  
11  
12  
13  
14  
15  
16  
17  
18  
19  
20  
21  
22  
23  
24  
25  
26  
27  
28  
29  
30  
31  
32  
33  
34  
35  
36  
37  
38  
39  
40  
41  
42  
43  
44  
45  
46  
47  
48  
49  
50  
51  
52  
53  
54  
55  
56  
57  
58  
59  
60

revision of the manuscript for intellectual content: All authors; Authors responsible for the overall content as guarantors: Bechtluft, BMF, Nascimento, BR, Beaton, AZ, Ribeiro, AL, Sable, C, Nunes, MCP.

### **Funding:**

The PROVAR+ investigators would like to thank Edwards Lifesciences Foundation® for supporting and funding the primary care screening program (PROVAR+) in Brazil, General Electric Healthcare® for providing echocardiography equipment and WiRed Health Resources for providing online curriculum on heart disease and echocardiography. The Telehealth Network of Minas Gerais was funded by the State Government of Minas Gerais, by its Health Department (Secretaria de Estado da Saúde de Minas Gerais) and FAPEMIG (Fundação de Amparo à Pesquisa de Minas Gerais), and by the Brazilian Government, including the Health Ministry and the Science and Technology Ministry and its research and innovation agencies, CNPq (Conselho Nacional de Desenvolvimento Científico e Tecnológico) e FINEP (Financiadora de Estudos e Projetos). Dr. Ribeiro was supported in part by CNPq (Bolsa de produtividade em pesquisa, 310679/2016-8) and by FAPEMIG (Programa Pesquisador Mineiro, PPM-00428-17). Medical students received scholarships from the National Institute of Science and Technology for Health Technology Assessment (IATS, project: 465518/2014-1).

### **Data sharing statement:**

Data analytic methods and study materials will be made available to other researchers for purposes of reproducing the results or replicating the procedure, from the corresponding author upon reasonable request.

**References:**

1. Watkins DA, Johnson CO, Colquhoun SM, et al. Global, Regional, and National Burden of Rheumatic Heart Disease, 1990-2015. *N Engl J Med* 2017;377(8):713-22. doi: 10.1056/NEJMoa1603693
2. Disease GBD, Injury I, Prevalence C. Global, regional, and national incidence, prevalence, and years lived with disability for 354 diseases and injuries for 195 countries and territories, 1990-2017: a systematic analysis for the Global Burden of Disease Study 2017. *Lancet* 2018;392(10159):1789-858. doi: 10.1016/S0140-6736(18)32279-7
3. Diamantino A, Beaton A, Aliku T, et al. A focussed single-view hand-held echocardiography protocol for the detection of rheumatic heart disease. *Cardiology in the young* 2018;28(1):108-17. doi: 10.1017/S1047951117001676
4. Nascimento BR, Beaton AZ, Nunes MCP, et al. Echocardiographic Prevalence of Rheumatic Heart Disease in Brazilian Schoolchildren: Data from the PROVAR Study. *International Journal of Cardiology* 2016;219:439-45. doi: 10.1016/j.ijcard.2016.06.088
5. Nascimento BR, Sable C, Nunes MCP, et al. Comparison Between Different Strategies of Rheumatic Heart Disease Echocardiographic Screening in Brazil: Data From the PROVAR (Rheumatic Valve Disease Screening Program) Study. *Journal of the American Heart Association* 2018;7(4) doi: 10.1161/JAHA.117.008039
6. Beaton A, Aliku T, Okello E, et al. The utility of handheld echocardiography for early diagnosis of rheumatic heart disease. *Journal of the American Society of Echocardiography : official publication of the American Society of Echocardiography* 2014;27(1):42-9. doi: 10.1016/j.echo.2013.09.013 [published Online First: 2013/11/05]
7. Remenyi B, Wilson N, Steer A, et al. World Heart Federation criteria for echocardiographic diagnosis of rheumatic heart disease--an evidence-based guideline.

1  
2  
3 *Nature reviews Cardiology* 2012;9(5):297-309. doi: 10.1038/nrcardio.2012.7 [published  
4  
5 Online First: 2012/03/01]

6  
7  
8 8. Zühlke L, Engel ME, Lemmer CE, et al. The natural history of latent rheumatic heart  
9  
10 disease in a 5 year follow-up study: a prospective observational study. *BMC Cardiovasc*  
11  
12 *Disord* 2016;16(46):1-6. [published Online First: 2016 Feb 19]

13  
14  
15 9. Nunes MCP, Sable C, Nascimento BR, et al. Simplified Echocardiography Screening  
16  
17 Criteria for Diagnosing and Predicting Progression of Latent Rheumatic Heart Disease.  
18  
19 *Circ Cardiovasc Imaging* 2019;12(2):e007928. doi:  
20  
21 10.1161/CIRCIMAGING.118.007928 [published Online First: 2019/02/02]

22  
23  
24 10. Santos J, Carmo G, Beaton AZ, et al. Challenges for the Implementation of the First  
25  
26 Large-Scale Rheumatic Heart Disease Screening Program in Brazil: The PROVAR Study  
27  
28 Experience. *Arq Bras Cardiol* 2017;108(4):370-74. doi: 10.5935/abc.20170047

29  
30  
31 11. Alkmim MB, Figueira RM, Marcolino MS, et al. Improving patient access to  
32  
33 specialized health care: the Telehealth Network of Minas Gerais, Brazil. *Bulletin of the*  
34  
35 *World Health Organization* 2012;90(5):373-8. doi: 10.2471/BLT.11.099408

36  
37  
38 12. Lopes EL, Beaton AZ, Nascimento BR, et al. Telehealth solutions to enable global  
39  
40 collaboration in rheumatic heart disease screening. *J Telemed Telecare* 2016 doi:  
41  
42 10.1177/1357633X16677902

43  
44  
45 13. Harris PA, Taylor R, Thielke R, et al. Research electronic data capture (REDCap)--a  
46  
47 metadata-driven methodology and workflow process for providing translational research  
48  
49 informatics support. *J Biomed Inform* 2009;42(2):377-81. doi: 10.1016/j.jbi.2008.08.010

50  
51  
52 14. Beaton A, Nascimento BR, Diamantino AC, et al. Efficacy of a Standardized  
53  
54 Computer-Based Training Curriculum to Teach Echocardiographic Identification of  
55  
56 Rheumatic Heart Disease to Nonexpert Users. *Am J Cardiol* 2016 doi:  
57  
58 10.1016/j.amjcard.2016.03.006

- 1  
2  
3 15. Kotit S, Said K, ElFaramawy A, et al. Prevalence and prognostic value of  
4 echocardiographic screening for rheumatic heart disease. *Open Heart* 2017;4(2):e000702.  
5  
6 doi: 10.1136/openhrt-2017-000702 [published Online First: 2018/01/19]  
7  
8  
9  
10 16. Beaton A, Aliku T, Dewyer A, et al. Latent Rheumatic Heart Disease: Identifying the  
11 Children at Highest Risk of Unfavorable Outcome. *Circulation* 2017;136(23):2233-44.  
12  
13 doi: 10.1161/CIRCULATIONAHA.117.029936  
14  
15  
16  
17 17. Engelman D, Wheaton GR, Mataika RL, et al. Screening-detected rheumatic heart  
18 disease can progress to severe disease. *Heart Asia* 2016;8(2):67-73. doi:  
19 10.1136/heartasia-2016-010847 [published Online First: 2016/12/10]  
20  
21  
22  
23 18. Remond M, Atkinson D, White A, et al. Are minor echocardiographic changes  
24 associated with an increased risk of acute rheumatic fever or progression to rheumatic  
25 heart disease? *Int J Cardiol* 2015;198:117-22. doi: 10.1016/j.ijcard.2015.07.005  
26  
27 [published Online First: 2015/07/15]  
28  
29  
30  
31  
32 19. Beaton A, Okello E, Aliku T, et al. Latent rheumatic heart disease: outcomes 2 years  
33 after echocardiographic detection. *Pediatr Cardiol* 2014;35(7):1259-67. doi:  
34 10.1007/s00246-014-0925-3  
35  
36  
37  
38  
39 20. Sanyahumbi A, Beaton A, Guffey D, et al. Two-year evolution of latent rheumatic  
40 heart disease in Malawi. *Congenit Heart Dis* 2019 doi: 10.1111/chd.12756 [published  
41 Online First: 2019/02/02]  
42  
43  
44  
45  
46  
47  
48  
49  
50  
51  
52  
53  
54  
55  
56  
57  
58  
59  
60

**Tables:****Table 1:** Baseline characteristics of patients with borderline and definite rheumatic heart disease.

| Variable:                                                                             | Result:        |
|---------------------------------------------------------------------------------------|----------------|
| <b>Borderline RHD (N=170)</b>                                                         |                |
| Age (years), median (IQR)                                                             | 14 (11 – 16)   |
| Female gender, N (%)                                                                  | 111 (65.7)     |
| Follow-up period (months), mean $\pm$ SD                                              | 28.9 $\pm$ 9.0 |
| 1. At least two morphological features of RHD of the MV without pathological MR or MS | 1. 5 (2.9)     |
| 2. Pathological MR                                                                    | 2. 135 (79.4)  |
| 3. Pathological AR                                                                    | 3. 30 (17.6)   |
| <b>Definite RHD (N=27)</b>                                                            |                |
| Age (years), median (IQR)                                                             | 14.0 (12 – 16) |
| Female gender, N (%)                                                                  | 19 (70.4)      |
| Follow-up period (months), mean $\pm$ SD                                              | 29.5 $\pm$ 9.2 |
| 1. Pathological MR and at least two morphological features of RHD of the MV           | 1. 24 (88.9)   |
| 2. MS mean gradient $\geq$ 4 mmHg                                                     | 2. 0           |
| 3. Pathological AR and at least two morphological features of RHD of the AV           | 3. 0           |
| 4. Borderline disease of both the AV and MV                                           | 4. 3 (11.1)    |

**Abbreviations:** AV: aortic valve; AR: aortic regurgitation; IQR: interquartile range (Q1 – Q3); MR: mitral regurgitation; MS: mitral stenosis; MV: mitral valve; RHD: rheumatic heart disease; SD: standard deviation.

**Table 2:** Baseline echocardiographic variables of patients with progression, stabilization and regression of rheumatic heart disease at 2-year follow-up.

| Valve:                      | Variable:                                                                | Progressed:<br>Borderline<br>Definite (N=29) | to<br>Definite (N=11) | Remained<br>stable<br>(borderline) /<br>other (N=156) |
|-----------------------------|--------------------------------------------------------------------------|----------------------------------------------|-----------------------|-------------------------------------------------------|
| <b>Mitral valve, N (%):</b> | <b>Anterior leaflet thickening</b>                                       | 18 (62.1)                                    |                       | 10 (90.9)                                             |
|                             | <b>Chordal thickening</b>                                                | 0                                            |                       | 2 (18.2)                                              |
|                             | <b>Restricted leaflet motion</b>                                         | 1 (3.4)                                      |                       | 4 (36.4)                                              |
|                             | <b>Excessive leaflet tip motion</b>                                      | 2 (6.9)                                      |                       | 6 (54.5)                                              |
|                             | <b>Mitral stenosis</b>                                                   | 0                                            |                       | 0                                                     |
|                             | <b>Any regurgitation</b>                                                 | 28 (96.6)                                    |                       | 11 (100)                                              |
|                             | <b>Regurgitation seen in 2 views</b>                                     | 26 (89.7)                                    |                       | 10 (90.9)                                             |
|                             | <b>Jet length <math>\geq 2</math> cm<math>\ddagger</math></b>            | 25 (86.2)                                    |                       | 9 (81.8)                                              |
|                             | <b>Velocity <math>\geq 3</math> m/s for 1 envelope<math>\S</math></b>    | 9 (31.0)                                     |                       | 4 (36.4)                                              |
|                             | <b>Pansystolic jet (color Doppler)</b>                                   | 15 (51.7)                                    |                       | 8 (72.7)                                              |
| <b>Aortic valve, N (%):</b> | <b>Irregular or focal thickening</b>                                     | 0                                            |                       | 2 (18.2)                                              |
|                             | <b>Coaptation defect</b>                                                 | 0                                            |                       | 1 (9.1)                                               |
|                             | <b>Restricted leaflet motion</b>                                         | 0                                            |                       | 0                                                     |
|                             | <b>Leaflet Prolapse</b>                                                  | 0                                            |                       | 0                                                     |
|                             | <b>Any regurgitation</b>                                                 | 2 (6.9)                                      |                       | 3 (27.3)                                              |
|                             | <b>Regurgitation seen in 2 views</b>                                     | 2 (6.9)                                      |                       | 2 (18.2)                                              |
|                             | <b>Jet length <math>\geq 1</math> cm<math>\ddagger</math></b>            | 1 (3.5)                                      |                       | 3 (27.3)                                              |
|                             | <b>Velocity <math>\geq 3</math> m/s in early diastole<math>\S</math></b> | 0                                            |                       | 1 (9.1)                                               |
|                             |                                                                          | <b>Pandiatolic jet (color Doppler)</b>       | 0                     |                                                       |

**Abbreviations:** \*Congenital mitral valve or aortic valve abnormalities were excluded.  $\ddagger$ Abnormal thickening of the anterior mitral valve leaflet  $\geq 3$  or  $>4$  mm using harmonic imaging.  $\ddagger$ In at least 1 view.  $\S$ Measurements available with the Vivid-Q exams.

1  
2  
3 **Figures legends:**  
4

5 **Figure 1:** RHD progression during the follow-up according to diagnosis at baseline.  
6

7 **Figure 2:** Cumulative incidence of disease unfavorable outcome in children with  
8 echocardiography-detected RHD according to according to risk categories of the  
9 simplified score.  
10  
11  
12  
13

14  
15  
16  
17 **Appendix Figure 1:** Receiver operator characteristic curve for echocardiography score  
18 showing predicted probability from the model (C-statistic of 0.71).  
19

20  
21 **Appendix Figure 2:** (A) Calibration plots by quintiles for RHD progression risk  
22 prediction model in the validation cohort. (B) Calibration plots by quintiles for favorable  
23 outcome RHD risk prediction model in the validation cohort.  
24  
25  
26  
27  
28  
29  
30  
31  
32  
33  
34  
35  
36  
37  
38  
39  
40  
41  
42  
43  
44  
45  
46  
47  
48  
49  
50  
51  
52  
53  
54  
55  
56  
57  
58  
59  
60



1  
2  
3  
4  
5  
6  
7  
8  
9  
10  
11  
12  
13  
14  
15  
16  
17  
18  
19  
20  
21  
22  
23  
24  
25  
26  
27  
28  
29  
30  
31  
32  
33  
34  
35  
36  
37  
38  
39  
40  
41  
42  
43  
44  
45  
46  
47  
48  
49  
50  
51  
52  
53  
54  
55  
56  
57  
58  
59  
60

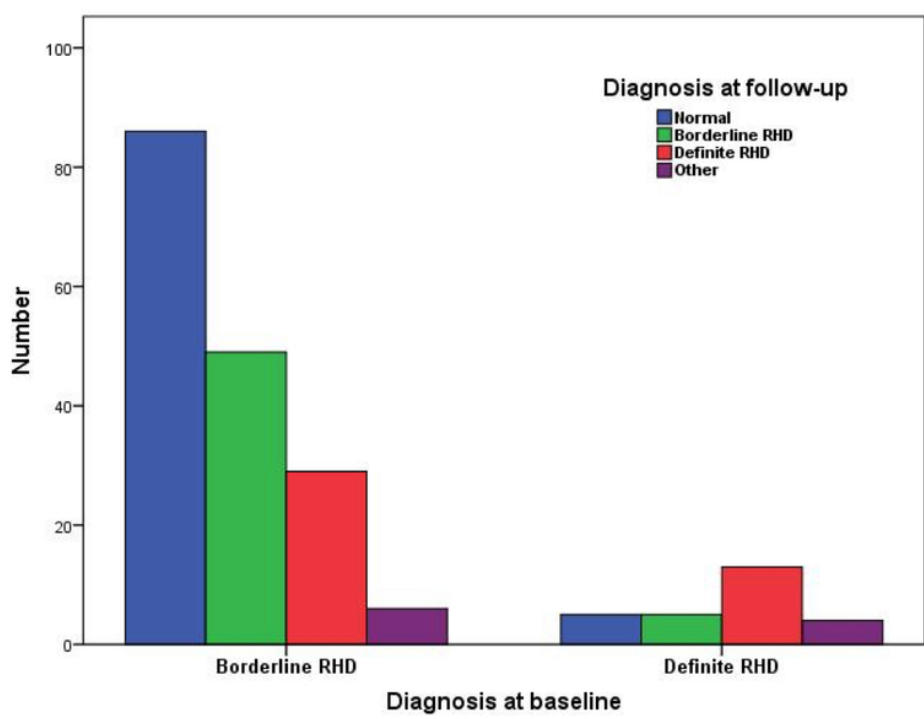

RHD progression during the follow-up according to diagnosis at baseline.

69x51mm (300 x 300 DPI)

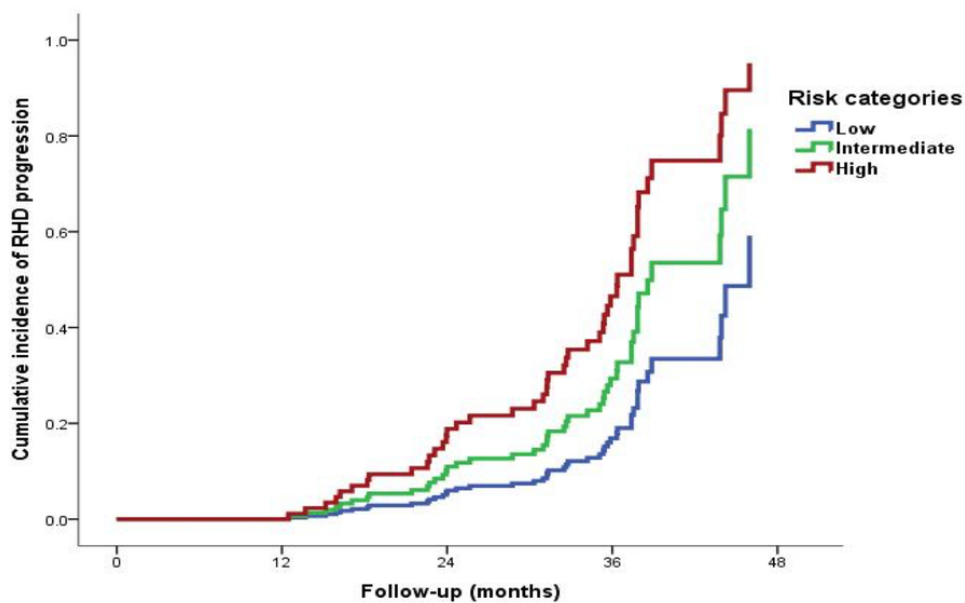

Cumulative incidence of disease unfavorable outcome in children with echocardiography-detected RHD according to according to risk categories of the simplified score.

78x52mm (300 x 300 DPI)

1  
2  
3  
4  
5  
6  
7  
8  
9  
10  
11  
12  
13  
14  
15  
16  
17  
18  
19  
20  
21  
22  
23  
24  
25  
26  
27  
28  
29  
30  
31  
32  
33  
34  
35  
36  
37  
38  
39  
40  
41  
42  
43  
44  
45  
46  
47  
48  
49  
50  
51  
52  
53  
54  
55  
56  
57  
58  
59  
60

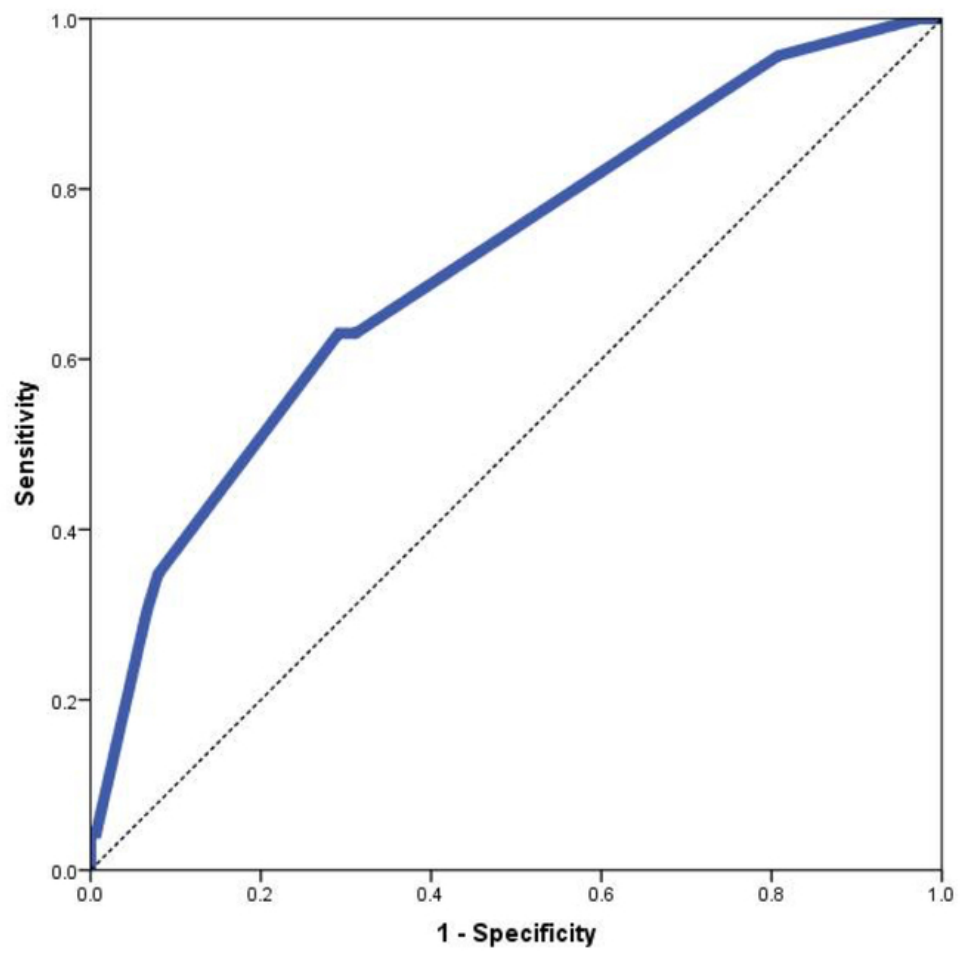

57x56mm (300 x 300 DPI)

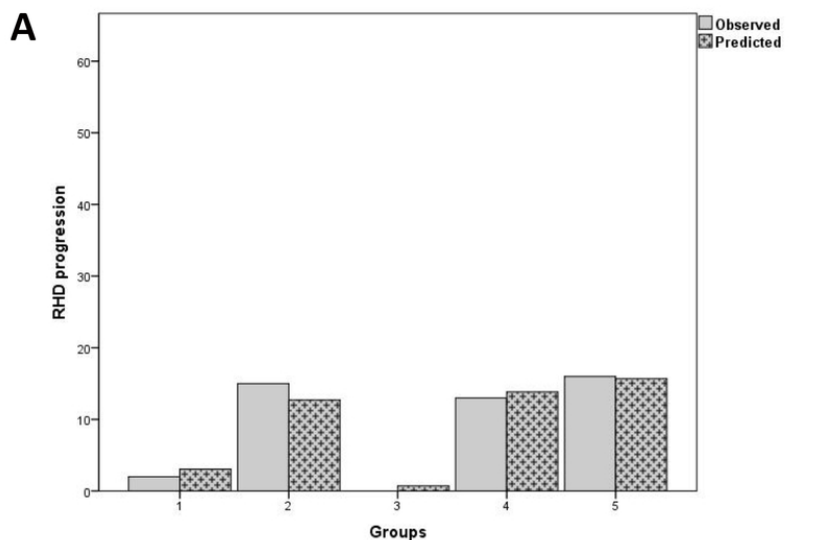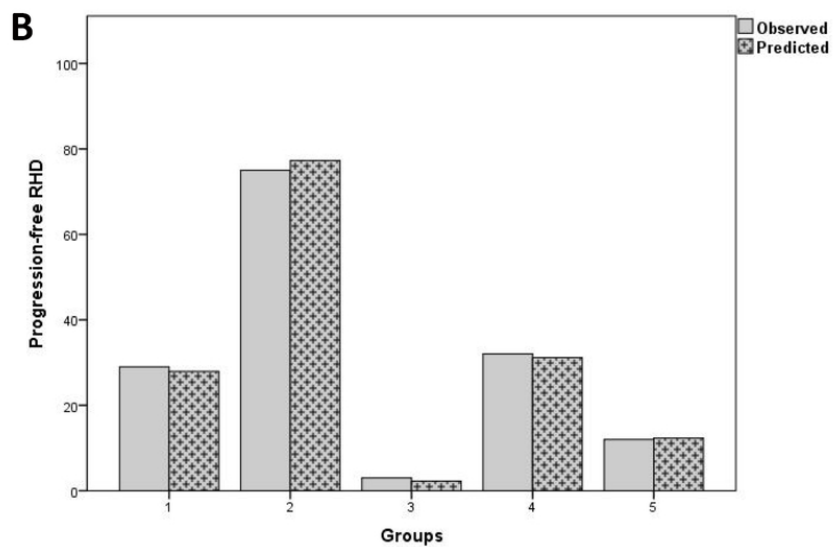

69x97mm (300 x 300 DPI)

# Reporting checklist for prediction model development and validation study.

Based on the TRIPOD guidelines.

## Instructions to authors

Complete this checklist by entering the page numbers from your manuscript where readers will find each of the items listed below.

Your article may not currently address all the items on the checklist. Please modify your text to include the missing information. If you are certain that an item does not apply, please write "n/a" and provide a short explanation.

Upload your completed checklist as an extra file when you submit to a journal.

In your methods section, say that you used the TRIPOD reporting guidelines, and cite them as:

Collins GS, Reitsma JB, Altman DG, Moons KG. Transparent reporting of a multivariable prediction model for individual prognosis or diagnosis (TRIPOD): The TRIPOD statement.

|                     | Reporting Item                                                                                                                                                                                                       | Page Number |
|---------------------|----------------------------------------------------------------------------------------------------------------------------------------------------------------------------------------------------------------------|-------------|
| <b>Title</b>        |                                                                                                                                                                                                                      |             |
|                     | <a href="#">#1</a> Identify the study as developing and / or validating a multivariable prediction model, the target population, and the outcome to be predicted.                                                    | 1           |
| <b>Abstract</b>     |                                                                                                                                                                                                                      |             |
|                     | <a href="#">#2</a> Provide a summary of objectives, study design, setting, participants, sample size, predictors, outcome, statistical analysis, results, and conclusions.                                           | 2           |
| <b>Introduction</b> |                                                                                                                                                                                                                      |             |
|                     | <a href="#">#3a</a> Explain the medical context (including whether diagnostic or prognostic) and rationale for developing or validating the multivariable prediction model, including references to existing models. | 1, 2        |
|                     | <a href="#">#3b</a> Specify the objectives, including whether the study describes the                                                                                                                                | 2           |

development or validation of the model or both.

## Methods

|    |                              |                      |                                                                                                                                                                         |
|----|------------------------------|----------------------|-------------------------------------------------------------------------------------------------------------------------------------------------------------------------|
| 1  |                              |                      |                                                                                                                                                                         |
| 2  |                              |                      |                                                                                                                                                                         |
| 3  | <b>Methods</b>               |                      |                                                                                                                                                                         |
| 4  |                              |                      |                                                                                                                                                                         |
| 5  | Source of data               | <a href="#">#4a</a>  | Describe the study design or source of data (e.g., randomized trial, cohort, or registry data), separately for the development and validation data sets, if applicable. |
| 6  |                              |                      | 6, 7                                                                                                                                                                    |
| 7  |                              |                      |                                                                                                                                                                         |
| 8  |                              |                      |                                                                                                                                                                         |
| 9  |                              |                      |                                                                                                                                                                         |
| 10 | Source of data               | <a href="#">#4b</a>  | Specify the key study dates, including start of accrual; end of accrual; and, if applicable, end of follow-up.                                                          |
| 11 |                              |                      | 7,8                                                                                                                                                                     |
| 12 |                              |                      |                                                                                                                                                                         |
| 13 |                              |                      |                                                                                                                                                                         |
| 14 | Participants                 | <a href="#">#5a</a>  | Specify key elements of the study setting (e.g., primary care, secondary care, general population) including number and location of centres.                            |
| 15 |                              |                      | 6, 7                                                                                                                                                                    |
| 16 |                              |                      |                                                                                                                                                                         |
| 17 |                              |                      |                                                                                                                                                                         |
| 18 | Participants                 | <a href="#">#5b</a>  | Describe eligibility criteria for participants.                                                                                                                         |
| 19 |                              |                      | 6                                                                                                                                                                       |
| 20 | Participants                 | <a href="#">#5c</a>  | Give details of treatments received, if relevant                                                                                                                        |
| 21 |                              |                      | 7                                                                                                                                                                       |
| 22 |                              |                      |                                                                                                                                                                         |
| 23 | Outcome                      | <a href="#">#6a</a>  | Clearly define the outcome that is predicted by the prediction model, including how and when assessed.                                                                  |
| 24 |                              |                      | 8                                                                                                                                                                       |
| 25 |                              |                      |                                                                                                                                                                         |
| 26 | Outcome                      | <a href="#">#6b</a>  | Report any actions to blind assessment of the outcome to be predicted.                                                                                                  |
| 27 |                              |                      | N/A                                                                                                                                                                     |
| 28 |                              |                      |                                                                                                                                                                         |
| 29 | Predictors                   | <a href="#">#7a</a>  | Clearly define all predictors used in developing or validating the multivariable prediction model, including how and when they were measured                            |
| 30 |                              |                      | 7, 8                                                                                                                                                                    |
| 31 |                              |                      |                                                                                                                                                                         |
| 32 |                              |                      |                                                                                                                                                                         |
| 33 |                              |                      |                                                                                                                                                                         |
| 34 | Predictors                   | <a href="#">#7b</a>  | Report any actions to blind assessment of predictors for the outcome and other predictors.                                                                              |
| 35 |                              |                      | N/A                                                                                                                                                                     |
| 36 |                              |                      |                                                                                                                                                                         |
| 37 |                              |                      |                                                                                                                                                                         |
| 38 | Sample size                  | <a href="#">#8</a>   | Explain how the study size was arrived at.                                                                                                                              |
| 39 |                              |                      | 9                                                                                                                                                                       |
| 40 | Missing data                 | <a href="#">#9</a>   | Describe how missing data were handled (e.g., complete-case analysis, single imputation, multiple imputation) with details of any imputation method.                    |
| 41 |                              |                      | N/A                                                                                                                                                                     |
| 42 |                              |                      |                                                                                                                                                                         |
| 43 |                              |                      |                                                                                                                                                                         |
| 44 |                              |                      |                                                                                                                                                                         |
| 45 | Statistical analysis methods | <a href="#">#10a</a> | If you are developing a prediction model describe how predictors were handled in the analyses.                                                                          |
| 46 |                              |                      | 8                                                                                                                                                                       |
| 47 |                              |                      |                                                                                                                                                                         |
| 48 |                              |                      |                                                                                                                                                                         |
| 49 | Statistical analysis methods | <a href="#">#10b</a> | If you are developing a prediction model, specify type of model, all model-building procedures (including any predictor selection), and method for internal validation. |
| 50 |                              |                      | 8                                                                                                                                                                       |
| 51 |                              |                      |                                                                                                                                                                         |
| 52 |                              |                      |                                                                                                                                                                         |
| 53 |                              |                      |                                                                                                                                                                         |
| 54 | Statistical analysis methods | <a href="#">#10c</a> | If you are validating a prediction model, describe how the predictions were calculated.                                                                                 |
| 55 |                              |                      | 8                                                                                                                                                                       |
| 56 |                              |                      |                                                                                                                                                                         |
| 57 |                              |                      |                                                                                                                                                                         |
| 58 | Statistical analysis         | <a href="#">#10d</a> | Specify all measures used to assess model performance and, if relevant,                                                                                                 |
| 59 |                              |                      | N/A                                                                                                                                                                     |

|    |                      |                      |                                                                           |        |
|----|----------------------|----------------------|---------------------------------------------------------------------------|--------|
| 1  | methods              |                      | to compare multiple models.                                               |        |
| 2  | Statistical analysis | <a href="#">#10e</a> | If you are validating a prediction model, describe any model updating     | N/A    |
| 3  | methods              |                      | (e.g., recalibration) arising from the validation, if done                |        |
| 4  |                      |                      |                                                                           |        |
| 5  |                      |                      |                                                                           |        |
| 6  | Risk groups          | <a href="#">#11</a>  | Provide details on how risk groups were created, if done.                 | N/A    |
| 7  |                      |                      |                                                                           |        |
| 8  | Development vs.      | <a href="#">#12</a>  | For validation, identify any differences from the development data in     | 8      |
| 9  | validation           |                      | setting, eligibility criteria, outcome, and predictors.                   |        |
| 10 |                      |                      |                                                                           |        |
| 11 |                      |                      |                                                                           |        |
| 12 | <b>Results</b>       |                      |                                                                           |        |
| 13 |                      |                      |                                                                           |        |
| 14 | Participants         | <a href="#">#13a</a> | Describe the flow of participants through the study, including the        | 9,10   |
| 15 |                      |                      | number of participants with and without the outcome and, if applicable,   |        |
| 16 |                      |                      | a summary of the follow-up time. A diagram may be helpful.                |        |
| 17 |                      |                      |                                                                           |        |
| 18 | Participants         | <a href="#">#13b</a> | Describe the characteristics of the participants (basic demographics,     | 9      |
| 19 |                      |                      | clinical features, available predictors), including the number of         |        |
| 20 |                      |                      | participants with missing data for predictors and outcome.                |        |
| 21 |                      |                      |                                                                           |        |
| 22 | Participants         | <a href="#">#13c</a> | For validation, show a comparison with the development data of the        | 9, 10  |
| 23 |                      |                      | distribution of important variables (demographics, predictors and         |        |
| 24 |                      |                      | outcome).                                                                 |        |
| 25 |                      |                      |                                                                           |        |
| 26 | Model                | <a href="#">#14a</a> | If developing a model, specify the number of participants and outcome     | 10     |
| 27 | development          |                      | events in each analysis.                                                  |        |
| 28 |                      |                      |                                                                           |        |
| 29 | Model                | <a href="#">#14b</a> | If developing a model, report the unadjusted association, if calculated   | N/A    |
| 30 | development          |                      | between each candidate predictor and outcome.                             |        |
| 31 |                      |                      |                                                                           |        |
| 32 | Model                | <a href="#">#15a</a> | If developing a model, present the full prediction model to allow         | 9, 10  |
| 33 | specification        |                      | predictions for individuals (i.e., all regression coefficients, and model |        |
| 34 |                      |                      | intercept or baseline survival at a given time point).                    |        |
| 35 |                      |                      |                                                                           |        |
| 36 | Model                | <a href="#">#15b</a> | If developing a prediction model, explain how to the use it.              | 10     |
| 37 | specification        |                      |                                                                           |        |
| 38 |                      |                      |                                                                           |        |
| 39 | Model                | <a href="#">#16</a>  | Report performance measures (with CIs) for the prediction model.          | 10     |
| 40 | performance          |                      |                                                                           |        |
| 41 |                      |                      |                                                                           |        |
| 42 | Model-updating       | <a href="#">#17</a>  | If validating a model, report the results from any model updating, if     | N/A    |
| 43 |                      |                      | done (i.e., model specification, model performance).                      |        |
| 44 |                      |                      |                                                                           |        |
| 45 |                      |                      |                                                                           |        |
| 46 | <b>Discussion</b>    |                      |                                                                           |        |
| 47 |                      |                      |                                                                           |        |
| 48 | Limitations          | <a href="#">#18</a>  | Discuss any limitations of the study (such as nonrepresentative sample,   | 12, 13 |
| 49 |                      |                      |                                                                           |        |
| 50 |                      |                      |                                                                           |        |

few events per predictor, missing data).

|    |                    |                      |                                                                                                                                                        |
|----|--------------------|----------------------|--------------------------------------------------------------------------------------------------------------------------------------------------------|
| 1  |                    |                      |                                                                                                                                                        |
| 2  |                    |                      |                                                                                                                                                        |
| 3  | Interpretation     | <a href="#">#19a</a> | For validation, discuss the results with reference to performance in the development data, and any other validation data 12                            |
| 4  |                    |                      |                                                                                                                                                        |
| 5  |                    |                      |                                                                                                                                                        |
| 6  | Interpretation     | <a href="#">#19b</a> | Give an overall interpretation of the results, considering objectives, limitations, results from similar studies, and other relevant evidence. 11 - 13 |
| 7  |                    |                      |                                                                                                                                                        |
| 8  |                    |                      |                                                                                                                                                        |
| 9  |                    |                      |                                                                                                                                                        |
| 10 | Implications       | <a href="#">#20</a>  | Discuss the potential clinical use of the model and implications for future research 12                                                                |
| 11 |                    |                      |                                                                                                                                                        |
| 12 |                    |                      |                                                                                                                                                        |
| 13 |                    |                      |                                                                                                                                                        |
| 14 | <b>Other</b>       |                      |                                                                                                                                                        |
| 15 | <b>information</b> |                      |                                                                                                                                                        |
| 16 |                    |                      |                                                                                                                                                        |
| 17 |                    |                      |                                                                                                                                                        |
| 18 | Supplementary      | <a href="#">#21</a>  | Provide information about the availability of supplementary resources, such as study protocol, Web calculator, and data sets. 20                       |
| 19 | information        |                      |                                                                                                                                                        |
| 20 |                    |                      |                                                                                                                                                        |
| 21 | Funding            | <a href="#">#22</a>  | Give the source of funding and the role of the funders for the present study. 14                                                                       |
| 22 |                    |                      |                                                                                                                                                        |
| 23 |                    |                      |                                                                                                                                                        |
| 24 |                    |                      |                                                                                                                                                        |

The TRIPOD checklist is distributed under the terms of the Creative Commons Attribution License CC-BY.

This checklist was completed on 03. January 2020 using <https://www.goodreports.org/>, a tool made by the

[EQUATOR Network](#) in collaboration with [Penelope.ai](#)



# BMJ Open

## Validation of a Simplified Score for Predicting Latent Rheumatic Heart Disease Progression Utilizing a Prospective Cohort of Brazilian Schoolchildren

|                                 |                                                                                                                                                                                                                                                                                                                                                                                                                                                                                                                                                                                                                                                                                                                                                                                                                                                                                                                                                                                                                                                                                                                                                                                                                                                                                                                                                                                                                                                                                                                                                                                                                                                                                                                                                                                                                                                                                                                                                                                                                                                                                                                                                                                                                                                                                                                                                                                                                                                                                                     |
|---------------------------------|-----------------------------------------------------------------------------------------------------------------------------------------------------------------------------------------------------------------------------------------------------------------------------------------------------------------------------------------------------------------------------------------------------------------------------------------------------------------------------------------------------------------------------------------------------------------------------------------------------------------------------------------------------------------------------------------------------------------------------------------------------------------------------------------------------------------------------------------------------------------------------------------------------------------------------------------------------------------------------------------------------------------------------------------------------------------------------------------------------------------------------------------------------------------------------------------------------------------------------------------------------------------------------------------------------------------------------------------------------------------------------------------------------------------------------------------------------------------------------------------------------------------------------------------------------------------------------------------------------------------------------------------------------------------------------------------------------------------------------------------------------------------------------------------------------------------------------------------------------------------------------------------------------------------------------------------------------------------------------------------------------------------------------------------------------------------------------------------------------------------------------------------------------------------------------------------------------------------------------------------------------------------------------------------------------------------------------------------------------------------------------------------------------------------------------------------------------------------------------------------------------|
| Journal:                        | <i>BMJ Open</i>                                                                                                                                                                                                                                                                                                                                                                                                                                                                                                                                                                                                                                                                                                                                                                                                                                                                                                                                                                                                                                                                                                                                                                                                                                                                                                                                                                                                                                                                                                                                                                                                                                                                                                                                                                                                                                                                                                                                                                                                                                                                                                                                                                                                                                                                                                                                                                                                                                                                                     |
| Manuscript ID                   | bmjopen-2020-036827.R1                                                                                                                                                                                                                                                                                                                                                                                                                                                                                                                                                                                                                                                                                                                                                                                                                                                                                                                                                                                                                                                                                                                                                                                                                                                                                                                                                                                                                                                                                                                                                                                                                                                                                                                                                                                                                                                                                                                                                                                                                                                                                                                                                                                                                                                                                                                                                                                                                                                                              |
| Article Type:                   | Original research                                                                                                                                                                                                                                                                                                                                                                                                                                                                                                                                                                                                                                                                                                                                                                                                                                                                                                                                                                                                                                                                                                                                                                                                                                                                                                                                                                                                                                                                                                                                                                                                                                                                                                                                                                                                                                                                                                                                                                                                                                                                                                                                                                                                                                                                                                                                                                                                                                                                                   |
| Date Submitted by the Author:   | 03-Feb-2020                                                                                                                                                                                                                                                                                                                                                                                                                                                                                                                                                                                                                                                                                                                                                                                                                                                                                                                                                                                                                                                                                                                                                                                                                                                                                                                                                                                                                                                                                                                                                                                                                                                                                                                                                                                                                                                                                                                                                                                                                                                                                                                                                                                                                                                                                                                                                                                                                                                                                         |
| Complete List of Authors:       | <p>Bechtluft, Bárbara; Hospital das Clínicas da Universidade Federal de Minas Gerais, Serviço de Cardiologia e Cirurgia Cardiovascular<br/> Nascimento, Bruno; Universidade Federal de Minas Gerais, Serviço de Cardiologia e Cirurgia Cardiovascular<br/> Sable, Craig ; Children's National Health System Washington, Cardiology<br/> Fraga, Clara; Hospital das Clínicas da Universidade Federal de Minas Gerais, Serviço de Cardiologia e Cirurgia Cardiovascular<br/> Barbosa, Márcia; Hospital das Clínicas da Universidade Federal de Minas Gerais, Serviço de Cardiologia e Cirurgia Cardiovascular<br/> Reis, Susana; Hospital das Clínicas da Universidade Federal de Minas Gerais, Serviço de Cardiologia e Cirurgia Cardiovascular<br/> Diamantino, Adriana; Hospital das Clínicas da Universidade Federal de Minas Gerais, Serviço de Cardiologia e Cirurgia Cardiovascular<br/> Meira, Zilda Maria; Hospital das Clínicas da Universidade Federal de Minas Gerais, Serviço de Cardiologia e Cirurgia Cardiovascular<br/> Castilho, Sandra Regina; Hospital das Clínicas da Universidade Federal de Minas Gerais, Serviço de Cardiologia e Cirurgia Cardiovascular<br/> Arantes, Nayana; Hospital das Clínicas da Universidade Federal de Minas Gerais, Serviço de Cardiologia e Cirurgia Cardiovascular<br/> Oliveira, Kaciane; Hospital das Clínicas da Universidade Federal de Minas Gerais, Serviço de Cardiologia e Cirurgia Cardiovascular<br/> Silva, José Luiz; Universidade Federal de Minas Gerais, Departamento de Estatística<br/> Rezende, Breno; Hospital das Clínicas da Universidade Federal de Minas Gerais, Serviço de Cardiologia e Cirurgia Cardiovascular<br/> Costa, Waydder Antônio; Hospital das Clínicas da Universidade Federal de Minas Gerais, Serviço de Cardiologia e Cirurgia Cardiovascular<br/> Mata, Mariana; Hospital das Clínicas da Universidade Federal de Minas Gerais, Serviço de Cardiologia e Cirurgia Cardiovascular<br/> Pereira, Augusto; Hospital das Clínicas da Universidade Federal de Minas Gerais, Serviço de Cardiologia e Cirurgia Cardiovascular<br/> Ribeiro, Antonio Luiz; Hospital das Clínicas da Universidade Federal de Minas Gerais, Serviço de Cardiologia e Cirurgia Cardiovascular<br/> Beaton, Andrea; Cincinnati Children's Hospital Medical Center, Cardiology<br/> Pereira Nunes, Maria Carmo; Hospital das Clínicas da Universidade Federal de Minas Gerais, Serviço de Cardiologia e Cirurgia Cardiovascular</p> |
| <b>Primary Subject Heading</b>: | Cardiovascular medicine                                                                                                                                                                                                                                                                                                                                                                                                                                                                                                                                                                                                                                                                                                                                                                                                                                                                                                                                                                                                                                                                                                                                                                                                                                                                                                                                                                                                                                                                                                                                                                                                                                                                                                                                                                                                                                                                                                                                                                                                                                                                                                                                                                                                                                                                                                                                                                                                                                                                             |

1  
2  
3  
4  
5  
6  
7  
8  
9  
10  
11  
12  
13  
14  
15  
16  
17  
18  
19  
20  
21  
22  
23  
24  
25  
26  
27  
28  
29  
30  
31  
32  
33  
34  
35  
36  
37  
38  
39  
40  
41  
42  
43  
44  
45  
46  
47  
48  
49  
50  
51  
52  
53  
54  
55  
56  
57  
58  
59  
60

|                            |                                                                                                                                                                                                            |
|----------------------------|------------------------------------------------------------------------------------------------------------------------------------------------------------------------------------------------------------|
| Secondary Subject Heading: | Epidemiology, Paediatrics                                                                                                                                                                                  |
| Keywords:                  | Paediatric rheumatology < PAEDIATRICS, Echocardiography < RADIOLOGY & IMAGING, Paediatric cardiology < RADIOLOGY & IMAGING, Cardiovascular imaging < RADIOLOGY & IMAGING, Ultrasound < RADIOLOGY & IMAGING |
|                            |                                                                                                                                                                                                            |

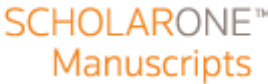

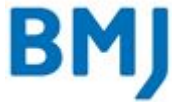

I, the Submitting Author has the right to grant and does grant on behalf of all authors of the Work (as defined in the below author licence), an exclusive licence and/or a non-exclusive licence for contributions from authors who are: i) UK Crown employees; ii) where BMJ has agreed a CC-BY licence shall apply, and/or iii) in accordance with the terms applicable for US Federal Government officers or employees acting as part of their official duties; on a worldwide, perpetual, irrevocable, royalty-free basis to BMJ Publishing Group Ltd ("BMJ") its licensees and where the relevant Journal is co-owned by BMJ to the co-owners of the Journal, to publish the Work in this journal and any other BMJ products and to exploit all rights, as set out in our [licence](#).

The Submitting Author accepts and understands that any supply made under these terms is made by BMJ to the Submitting Author unless you are acting as an employee on behalf of your employer or a postgraduate student of an affiliated institution which is paying any applicable article publishing charge ("APC") for Open Access articles. Where the Submitting Author wishes to make the Work available on an Open Access basis (and intends to pay the relevant APC), the terms of reuse of such Open Access shall be governed by a Creative Commons licence – details of these licences and which [Creative Commons](#) licence will apply to this Work are set out in our licence referred to above.

Other than as permitted in any relevant BMJ Author's Self Archiving Policies, I confirm this Work has not been accepted for publication elsewhere, is not being considered for publication elsewhere and does not duplicate material already published. I confirm all authors consent to publication of this Work and authorise the granting of this licence.

1  
2  
3 **1 Validation of a Simplified Score for Predicting Latent Rheumatic Heart Disease**  
4  
5 **2 Progression Utilizing a Prospective Cohort of Brazilian Schoolchildren**  
6  
7  
8  
9

10 Bárbara M F Bechtluft, MD<sup>1,2</sup>, Bruno R Nascimento, MD, MSc, PhD, FACC<sup>1,2</sup>, Craig A  
11 Sable, MD<sup>3</sup>, Clara L Fraga, MD<sup>1</sup>, Márcia M Barbosa, MD, PhD<sup>1</sup>, Susana D P Reis, MD<sup>1</sup>,  
12 Adriana C. Diamantino<sup>1</sup>, MD, MSc<sup>4</sup>, Zilda Maria A Meira, MD, PhD<sup>1,2</sup>, Sandra Regina  
13 T Castilho, MD, MSc<sup>1,2</sup>, Nayana F Arantes, MD, MSc<sup>1</sup>, Kaciane K B Oliveira, BSN,  
14 MSc<sup>1</sup>, Jose Luiz Padilha da Silva, PhD<sup>4</sup>, Breno D F Rezende, MD<sup>2</sup>, Waydder Antônio A.  
15 Costa, MD<sup>2</sup>, Mariana D O Mata, MD<sup>2</sup>, Augusto F C Pereira, MD<sup>2</sup>, Antonio Luiz P  
16 Ribeiro, MD, PhD<sup>1,2</sup>, Andrea Z Beaton, MD<sup>6</sup>, Maria Carmo P Nunes, MD, PhD<sup>1</sup>.

17  
18  
19  
20  
21  
22  
23 On behalf of the PROVAR (*Programa de Rastreamento da Valvopatia Reumática*) investigators.  
24  
25  
26  
27

28 <sup>1</sup> Serviço de Cardiologia e Cirurgia Cardiovascular e Centro de Telessaúde do Hospital das Clínicas da  
29 UFMG, Belo Horizonte - MG, Brazil; <sup>2</sup> Faculdade de Medicina da Universidade Federal de Minas Gerais,  
30 Belo Horizonte - MG, Brazil; <sup>3</sup> Children's National Health System, Washington – DC, United States; <sup>4</sup>  
31 FIPMoc University Center, Montes Claros, Minas Gerais, Brazil; <sup>5</sup> Department of Statistics, Universidade  
32 Federal do Paraná, Curitiba - PR, Brazil; <sup>6</sup> The Heart Institute, Cincinnati Childrens Hospital Medical  
33 Center, and the University of Cincinnati School of Medicine, Cincinnati - OH, United States.  
34  
35  
36  
37  
38  
39

40 This study was funded by Edwards Lifesciences Foundation, USA.

41  
42 The funder did not have any relationship with the conduct of the study, the collection, analysis, and  
43 interpretation of the data, and the preparation, review, or approval of this manuscript.  
44  
45  
46  
47

48 Corresponding author:

49 Bruno Ramos Nascimento, MD, MSc, PhD, FACC

50 Hospital das Clínicas da Universidade Federal de Minas Gerais

51 Rua Muzambinho 710/802, Serra

52 Belo Horizonte, Minas Gerais, Brasil, CEP 30.210-530

53 Tel.: +55 31 3307 9437; Fax: +55 31 32847298.  
54  
55  
56  
57  
58  
59  
60

1  
2  
3 31 **Abstract:**  
4

5 32 **Objectives:** Echocardiographic (echo) screening is an important tool to estimate  
6  
7  
8 33 rheumatic heart disease (RHD) prevalence, but the natural history of screen-detected  
9  
10 34 RHD remains unclear. The PROVAR+ study, which uses non-experts, telemedicine and  
11  
12 35 portable echo, pioneered RHD screening in Brazil. We aimed to assess the mid-term  
13  
14 36 evolution of Brazilian schoolchildren (5-18 years) with echocardiography-detected  
15  
16 37 subclinical RHD and to assess the performance of a simplified score consisting of 5  
17  
18 38 components of the WHF criteria, as a predictor of unfavorable echocardiographic  
19  
20 39 outcomes.  
21  
22

23  
24 40 **Setting:** Public schools of underserved areas and private schools in Minas Gerais,  
25  
26 41 southeast Brazil.  
27

28 42 **Participants:** Total 197 patients (170 borderline and 27 definite RHD) with follow-up of  
29  
30 43 29±9 months were included. Median age was 14 (12–16) years, and 130 (66%) were  
31  
32 44 female. Only 4 patients in the definite group were regularly receiving penicillin.  
33  
34

35 45 **Primary and secondary outcome measures:** Unfavorable outcome was based on the 2-  
36  
37 46 years follow-up echo, defined as worsening diagnostic category, remaining with mild  
38  
39 47 definite RHD or development/worsening of valve regurgitation/stenosis.  
40  
41

42 48 **Results:** Among patients with borderline RHD, 29 (17.1%) progressed to definite, 49  
43  
44 49 (28.8%) remained stable, 86 (50.6%) regressed to normal and 6 (3.5%) were reclassified  
45  
46 50 as other heart diseases. Among those with definite RHD, 13 (48.1%) remained in the  
47  
48 51 category, while 5 (18.5%) regressed to borderline, 5 (18.5%) regressed to normal and 4  
49  
50 52 (14.8%) were reclassified as other heart disease. The simplified echo score was a  
51  
52 53 significant predictor of RHD unfavorable outcome (hazard ratio [HR] 1.197, 95%  
53  
54 54 confidence interval 1.098-1.305,  $p<0.001$ ).  
55  
56  
57

58 55 **Conclusion:** The simple risk score provided an accurate prediction of RHD status at 2-  
59  
60

1  
2  
3 56 year follow-up, showing a good performance in Brazilian schoolchildren, with a potential  
4  
5 57 value for risk stratification and monitoring of echocardiography-detected RHD.  
6  
7

8 **Trial registration:** N/A.  
9

10 59  
11

12 **Key-words:** Rheumatic heart disease; screening; echocardiography; follow-up;  
13  
14 61 prognosis.  
15  
16

17 **Word count:** 2,456  
18  
19 63

20  
21  
22 64 **Strengths and limitations of this study:**  
23

- 24 65 • This study utilized the PROVAR+ cohort, the first large prospective cohort of  
25  
26 66 schoolchildren with latent RHD in Brazil.  
27  
28 67 • This is the first validation study of a previously published (2019) scoring system  
29  
30 68 to discriminate children found to have early echocardiography evidence of RHD  
31  
32 69 into those who are likely to have favorable vs. unfavorable outcome.  
33  
34 70 • Echocardiograms were interpreted by the consensus of two experts with high  
35  
36 71 familiarity in the World Heart Federation Criteria.  
37  
38 72 • As this was an established cohort, no predefined sample size was calculated for  
39  
40 73 this study and all screen-positive patients were invited for follow-up.  
41  
42 74 • A passive recruitment strategy meant that there was low overall participation; only  
43  
44 75 36% of screen-positive children were enrolled in the follow-up program, reducing  
45  
46 76 the size of the potential cohort.  
47  
48  
49  
50

51 77  
52

53 78  
54  
55

56 79  
57

58 80  
59  
60

81 **Authors e-mails:**

82 Bárbara Bechtluft (*bm.fernandes@icloud.com*), Bruno Nascimento  
83 (*ramosnas@gmail.com*), Craig Sable (*csable@childrensnational.org*), Clara Fraga  
84 (*clara-leal@hotmail.com*), Márcia Barbosa (*marciamelobarbosa@gmail.com*), Susana  
85 Reis (*susanadpreis@hotmail.com*), Adriana Diamantino  
86 (*dri\_diamantino@yahoo.com.br*) , Zilda Maria Meira (*zilda.m.a.meira@gmail.com*),  
87 Sandra Regina Castilho (*srt.castilho@gmail.com*), Nayana Arantes  
88 (*nayanaflamini@yahoo.com.br*), Kaciane Oliveira (*kacianebruno@hotmail.com*), Jose  
89 Luiz Silva (*jlpadilha@yahoo.com.br*), Breno Rezende (*brenodfr@gmail.com*), Waydder  
90 Antônio Costa (*wayddera@gmail.com*), Mariana Mata  
91 (*marianadoliveira@hotmail.com*), Augusto Pereira (*augustofcp@hotmail.com*), Antonio  
92 Luiz Ribeiro (*tom1963br@yahoo.com.br*), Andrea Beaton (*andrea.beaton@cchmc.org*),  
93 Maria Carmo Nunes (*mcarmo@waymail.com.br*).

94

95

96

97

98

99

100

101

102

103

104

105

## 106 **Introduction**

107 Rheumatic heart disease (RHD) is the major cause of acquired cardiovascular  
108 disease in children and young adults worldwide. Its global burden is noteworthy, affecting  
109 39 million people and causing 319,400 deaths annually<sup>1 2</sup>. The disease is more prevalent  
110 in low and middle-income countries, where it is typically diagnosed only once advanced  
111 valve disease is present and symptoms develop<sup>1</sup>. However, there is a latent period, often  
112 up to decade, between the first episode of acute rheumatic fever (ARF) and advanced  
113 RHD, when early identification can improve outcomes.

114 In this context, echocardiographic screening in endemic areas has emerged as an  
115 effective approach to identify patients who are in this latent, subclinical stage of RHD<sup>3-6</sup>.  
116 Diagnostic criteria for subclinical RHD– asymptomatic patients with echocardiographic  
117 findings suggestive of RHD without history of ARF – have been standardized by the  
118 World Heart Federation (WHF) consensus in 2012. Three categories are defined: definite,  
119 borderline and normal<sup>7</sup>. The morphological findings of RHD and the criteria for  
120 pathologic valve regurgitation are also established. This standardization has allowed for  
121 comparison between studies carried out in different populations.

122 Although criteria are standardized, prognosis and natural history of latent RHD,  
123 and the impact of clinical interventions – such as secondary prophylaxis – still require  
124 further evaluation. The first studies that evaluated the follow-up of patients with  
125 subclinical RHD have several limitations, including relatively short follow-up times,  
126 small sample size and lack of standardized criteria for echocardiographic and clinical  
127 progression<sup>8</sup>. However, data suggests that RHD progression in children with latent RHD  
128 is not negligible<sup>9</sup>. Therefore, we aimed to assess the mid-term evolution of Brazilian  
129 schoolchildren (5-18 years) with subclinical RHD findings observed in  
130 echocardiographic screening<sup>4 5 10</sup> and to assess the performance of a simplified score



1  
2  
3 131 developed by Nunes *et al*<sup>9</sup>, consisting of 5 components of the WHF criteria, as a predictor  
4  
5 132 of unfavorable echocardiographic outcomes.  
6  
7  
8 133

9  
10 134 **Methods:**

11  
12 135 This is a prospective cohort study with systematic clinical and echocardiographic  
13  
14 136 follow-up of children with subclinical RHD. It was derived from a RHD screening  
15  
16 137 program, established in Brazil in 2014 - the PROVAR+ (*Programa de Rastreamento da*  
17  
18 138 *Valvopatia Reumática*) study - a collaboration between the Children's National Health  
19  
20 139 System, Washington – DC, US, the Universidade Federal de Minas Gerais and the  
21  
22 140 Telehealth Network of Minas Gerais<sup>11</sup>, Belo Horizonte, Minas Gerais, Brazil. This  
23  
24 141 screening program has already screened more than 12,000 children and adolescents from  
25  
26 142 21 schools in Minas Gerais, Brazil, between October 2014 and December 2016<sup>4 5 10</sup>. The  
27  
28 143 study protocol conforms to the ethical guidelines of the 1975 Declaration of Helsinki and  
29  
30 144 ethics approval was obtained from the institutional review boards of the participant  
31  
32 145 institutions (Comitê de Ética em Pesquisa da Universidade Federal de Minas Gerais and  
33  
34 146 Children's National Health System Institutional Review Board) as well as from the local  
35  
36 147 Boards of Health and Education.  
37  
38  
39  
40  
41

42 148 In brief, public schools and primary care centers from low income areas of  
43  
44 149 metropolitan Belo Horizonte, Brazil, were selected to participate in the screening  
45  
46 150 program, based on socioeconomic data (Human Development Index (HDI)) and priorities  
47  
48 151 of the health authorities. Selected private schools (2) were also invited in order to  
49  
50 152 characterize RHD in high-income youth. All asymptomatic students, without history of  
51  
52 153 ARF or RHD, were eligible for screening<sup>4 5</sup>. All participants were informed about the  
53  
54 154 study and had informed consent signed by their parents or by themselves, if of legal age.  
55  
56  
57  
58  
59  
60

1  
2  
3 155 The echocardiographic screening was performed from 2014 to 2016 by  
4  
5 156 previously trained non-physicians (nurses and imaging technicians) and images were  
6  
7 157 uploaded to a dedicated cloud storage system and interpreted through telemedicine by  
8  
9 158 cardiologists in Brazil and the US<sup>12</sup>, applying the WHF criteria. Detailed screening  
10  
11 159 methodology has been previously published<sup>4 5</sup>.

12  
13  
14 160 Participants with abnormal screening were invited for the UFMG Pediatric  
15  
16 161 Cardiology outpatient clinics, and were prospectively enrolled. All patients included in  
17  
18 162 the follow-up from Belo Horizonte had the baseline screening diagnosis confirmed by  
19  
20 163 standard echocardiography, scheduled in the University Hospital. The ones from Montes  
21  
22 164 Claros had the diagnosis based on consensus reads of VSCAN studies. Specific care of  
23  
24 165 these patients was left to the discretion of the caring cardiologist with experience in RHD.  
25  
26 166 Families received phone reminders of the follow-up visits and, when necessary, study  
27  
28 167 correspondence by mail. The prespecified 24-month follow-up consisted of a clinical  
29  
30 168 appointment by a pediatrician (BB, AD), with standardized clinical history  
31  
32 169 (demographics, comorbidities, cardiovascular symptoms, recurrence of pharyngitis,  
33  
34 170 medications and adherence to prophylaxis – when indicated) and detailed physical  
35  
36 171 examination forms, and standard echocardiogram by an experienced pediatric  
37  
38 172 cardiologist (SR) (Vivid IQ®, GE Healthcare, Milwaukee, WI, USA), blinded to the  
39  
40 173 findings of the previous exam, and based on the WHF criteria. A standardized imaging  
41  
42 174 protocol was applied. Patients were then reclassified by consensus with adjudication by  
43  
44 175 2 experts (MCN and ZM) in the 4 pre-established categories. Specific care of these  
45  
46 176 patients and indication for secondary prophylaxis – not mandatory for any category – was  
47  
48 177 left to the discretion of the caring cardiologist (ZM, SRC and MCN). All echo and clinical  
49  
50 178 variables were systematically collected in a dedicated online database.  
51  
52  
53  
54  
55  
56  
57  
58  
59  
60

1  
2  
3 179 The simplified echocardiographic score proposed by Nunes *et al*, consisting of 5  
4  
5 180 variables (mitral valve anterior leaflet thickening, excessive leaflet tip motion, and  
6  
7  
8 181 regurgitation jet length  $\geq 2$  cm, and aortic valve focal thickening and any regurgitation)<sup>9</sup>  
9  
10 182 was applied to this population. An unfavorable outcome was defined as  
11  
12  
13 183 worsening in diagnostic category (borderline to definite),  
14  
15 184 remaining with mild definite RHD or worsening in the grade of mitral  
16  
17 185 or aortic valve regurgitation or development/worsening grade  
18  
19  
20 186 of mitral stenosis. A favorable outcome was defined as disease regression –  
21  
22 187 considered when an improvement in diagnostic category was observed or in case of  
23  
24 188 reduction of regurgitation severity – or remaining with stable borderline RHD.  
25

#### 26 189 ***Patient and public involvement***

27  
28  
29 190 Patients and public were not involved in the design and conduct of this research.  
30

#### 31 191 ***Data analysis and statistics***

32  
33  
34 192 Data were systematically entered to the RedCap® online database<sup>13</sup>. Statistical  
35  
36 193 analysis was performed using SPSS® software version 23.0 for Mac OSX (SPSS Inc.,  
37  
38 194 Chicago, Illinois). As we utilized a pre-existing cohort, no pre-specified sample size  
39  
40 195 calculation was performed, and we considered the total sample of asymptomatic  
41  
42 196 schoolchildren enrolled in the 26-month screening. All screen-positive children who  
43  
44 197 attended the follow-up visit were included in this analysis. Continuous variables were  
45  
46 198 expressed as mean  $\pm$  standard deviation (SD) or as median and interquartile range (IQR,  
47  
48 199 [Q1/Q3]) when appropriate. Categorical variables were expressed as absolute values and  
49  
50 200 percentages. The between-group comparison (progression vs regression/stable) was  
51  
52 201 performed using the Fisher's Exact Test for categorical variables.  
53  
54  
55

56 202 The simplified echo score<sup>9</sup> was applied to this population of schoolchildren to  
57  
58 203 assess its discrimination and calibration in predicting unfavorable outcome using logistic  
59  
60

1  
2  
3 204 regression. The predictive value of the score was assessed as a time-dependent variable  
4  
5 205 in the Cox proportional hazards model. RHD favorable outcome rates of the 3 risk  
6  
7 206 categories (low/intermediate/high), based on the hazard of evolving with unfavorable  
8  
9 207 echo outcome, were estimated by the Kaplan–Meier method and compared by the log-  
10  
11  
12 208 rank test. A two-tailed significance level of 0.05 was considered statistically significant.  
13  
14  
15 209

## 17 210 **Results:**

19 211 Total 197 patients were included, being 114 (36%) out of 317 children with  
20  
21 212 positive screening echos in Belo Horizonte and 83 (37%) of 224 in Montes Claros, with  
22  
23 213 a mean 29±9 (range 11 to 48) months follow-up, considering the latest clinical visit. At  
24  
25 214 baseline, 170 (86.3%) had borderline and 27 (13.7%) definite RHD. Median age was 14.1  
26  
27 215 (IQR 12.0 – 16.2) years, and 130 (66%) were female. Belo Horizonte and Montes Claros  
28  
29 216 had similar rates of borderline (85.1% vs. 88.0%) and definite (14.9% vs. 12.0%) RHD  
30  
31 217 at baseline (p=0.56). Only 13 (6.6%) patients, 4 of whom originally classified as definite  
32  
33 218 RHD, were regularly receiving Penicillin (7 with <80% adherence). Detailed baseline  
34  
35 219 demographic and echocardiographic characteristics are depicted in **Table 1**. Compared to  
36  
37 220 the 344 patients without follow-up, the study sample had similar baseline distribution of  
38  
39 221 borderline/definite diagnoses (86.3%/13.7% vs. 89.5%/10.5%, p=0.26) as well as WHF  
40  
41 222 subgroups for borderline (p=0.27) and definite (p=0.10) RHD, human development index  
42  
43 223 (0.77 [IQR 0.76 – 0.80] vs. 0.77 [IQR 0.76 – 0.80], p=0.22, household (4 [IQR 4 – 5] vs.  
44  
45 224 4 [IQR 4 – 6] inhabitants, p=0.25) and age (14.2 [IQR 12.0 – 16.2] vs. 14.1 [IQR 11.8 –  
46  
47 225 15.8] years, p=0.46), but a slightly higher proportion of females (66.3% vs. 57.0%,  
48  
49 226 p=0.03) was observed.  
50  
51  
52  
53  
54

56 227 Cardiovascular symptoms were reported by 69 (35%) patients in the follow-up  
57  
58 228 visits, including dyspnea (15.2%) and palpitations (14.2%). However, clinical evaluation,  
59  
60

1  
2  
3 229 physical examination, and echocardiograms did not support a cardiac etiology of these  
4  
5 230 symptoms. During follow-up, at least 1 episode of pharyngitis was reported by 92  
6  
7 231 patients, with 62 (67%) adequately treated in primary care, as informed by patients or  
8  
9 232 parents.

10  
11  
12 233 Among patients with borderline RHD, 29 (17.1%) progressed to definite RHD, 49  
13  
14 234 (28.8%) remained stable, 86 (50.6%) regressed to normal and 6 (3.5%) were reclassified  
15  
16 235 as other heart diseases. Among those with definite RHD, 13 (48.1%) remained in the  
17  
18 236 category, while 5 (18.5%) regressed to borderline, 5 (18.5%) regressed to normal and 4  
19  
20 237 (14.8%) were reclassified as other heart disease (**Figure 1**). No patients had worsening  
21  
22 238 grade of mitral or aortic regurgitation or  
23  
24 239 development/worsening grade of mitral stenosis.

25  
26 240 Among borderline patients who progressed, 26 (89.7%) had mitral regurgitation  
27  
28 241 (MR), 2 had aortic regurgitation and 14 (48.3%) had at least 1 morphological abnormality  
29  
30 242 of the mitral valve as the initial criteria. At follow-up, 12 patients developed  
31  
32 243 morphological abnormalities of the mitral (N=10) and aortic (N=4) valves. No patients  
33  
34 244 developed ventricular dysfunction or enlargement (**Table 2**).

#### 35 245 **Predictive Performance of the simplified echocardiographic score**

36  
37 246 The simplified score, based on components of the WHF criteria, was a significant  
38  
39 247 predictor of RHD unfavorable outcome (hazard ratio [HR] 1.197, 95% confidence  
40  
41 248 interval [CI] 1.098 - 1.305,  $p < 0.001$ ). The discrimination of the score was good (C-  
42  
43 249 statistic=0.714, 95% CI 0.627 - 0.801) and the model was well calibrated (**Appendix**  
44  
45 250 **Figure 1**). A Hosmer-Lemeshow  $p = 0.589$  confirmed no significant difference between  
46  
47 251 observed and predicted unfavorable outcome (**Appendix Figure 2, A and B**).

48  
49 252 The score classified 121 children in low risk, 48 in the intermediate risk, and 28  
50  
51 253 in the high-risk groups. Additionally, the score model was able to separate low-,  
52  
53  
54  
55  
56  
57  
58  
59  
60

1  
2  
3 254 intermediate- and high-risk categories for unfavorable disease outcome (**Figure 2**).  
4  
5 255 Favorable RHD outcome risk rate in the low-risk children at 1-, and 2-years follow-up  
6  
7 256 was 99%, and 97% respectively, compared to 76%, and 47% in the high-risk group.  
8  
9

10 257

11  
12 258 **Discussion:**

13  
14 259 In agreement with growing international data<sup>8</sup>, subclinical RHD in Brazil has a  
15  
16 260 variable outcome. Approximately 1 in 5 children with borderline RHD progressed to  
17  
18 261 definite RHD and more than 1 in 3 children with definite RHD remained in this category.  
19  
20 262 A recently developed risk stratification score<sup>9</sup> was a modest, but significant, predictor of  
21  
22 263 unfavorable echocardiographic outcome in our population.  
23  
24

25  
26 264 Since its inception, the PROVAR+ research program has been studying the use of  
27  
28 265 echocardiography to improve the early detection of RHD<sup>12</sup> in Brazil. Epidemiological  
29  
30 266 characterization of RHD prevalence, and study of portable and handheld devices, task-  
31  
32 267 shifting, and telemedicine have been undertaken to understand how to improve diagnostic  
33  
34 268 access in low-resource populations<sup>4 10 12 14</sup>. Determining outcomes for children with  
35  
36 269 subclinical RHD is a critical next step to inform program evaluation, as for other screening  
37  
38 270 programs worldwide. These data, with a mean follow-up of 29-months, show that both  
39  
40 271 borderline and definite RHD are dynamic phenotypes, with borderline RHD showing  
41  
42 272 more favorable outcomes<sup>6 8 15</sup>.  
43  
44

45  
46 273 Nearly half (46%) of the youth in this program improved echocardiographically  
47  
48 274 to normal, similar to global rates ranging from 47-67%<sup>8 16</sup>. Yet borderline RHD was not  
49  
50 275 a benign finding, with one in five (17%) of children progressing to definite RHD, in line  
51  
52 276 with global data which has reported 17-23% progression at 2.5-7.5 years of follow-up<sup>8 17</sup>  
53  
54 277 <sup>18</sup>. Children with definite RHD at diagnosis had more unfavorable outcomes with 40%  
55  
56 278 remaining definite, though no child progressed to moderate or severe RHD, reflecting a  
57  
58  
59  
60

1  
2  
3 279 mildly phenotype in screen-detected RHD in Brazilian youth compared to global data<sup>8 15</sup>  
4  
5 280<sup>17 19 20</sup>. This milder phenotype may reflect the relatively stronger public health system in  
6  
7 281 Brazil, compared to many other RHD-endemic areas, facilitating higher rates of sore  
8  
9 282 throat and rheumatic fever diagnoses, but more data are needed. The impact of secondary  
10  
11 283 prophylaxis in this cohort cannot be determined, as few were prescribed prophylaxis and  
12  
13 284 adherence was not well captured, and we await the results of a large randomized clinical  
14  
15 285 trial on the impact of penicillin prophylaxis in screen-detected youth, currently ongoing  
16  
17 286 in Uganda (*Gwoko Adunu pa Lutino*; clinicaltrials.gov No. NCT03346525).

21 287       The most novel aspect of this follow-up study was the application of a newly  
22  
23 288 developed score to predict unfavorable outcome among children with screen-detected  
24  
25 289 RHD<sup>9</sup>. Addressing the need to simplify the WHF criteria and improve the applicability  
26  
27 290 for use with handheld echocardiography (lacking spectral Doppler), Nunes et al  
28  
29 291 developed a five-component point-based score that showed considerable accuracy for  
30  
31 292 predicting disease progression in two large African cohorts<sup>9</sup>. The score showed modest  
32  
33 293 discrimination for unfavorable outcome in our population, potentially related to the less  
34  
35 294 aggressive RHD phenotype in Brazil as compared to African cohorts<sup>8 19</sup>, suggesting wider  
36  
37 295 external validation and recalibration may be necessary for global application. However,  
38  
39 296 still in a population with a relatively low risk of progression – especially to clinically  
40  
41 297 significant disease – its discrimination of subgroups at higher risk of unfavorable  
42  
43 298 echocardiographic outcome points towards an useful public health tool, and urges further  
44  
45 299 investigations.

51 300       The PROVAR+ program has encountered several context-specific limitations and  
52  
53 301 lessons learned. First, the program has struggled with low-participation and high attrition  
54  
55 302 compared to other global populations: only 40% of students have consented to school-  
56  
57 303 based screening<sup>5</sup> and only 36% of screen-positive children from the schools were enrolled  
58  
59  
60

1  
2  
3 304 in follow-up. Consequently, the sample size was limited – although comparable with  
4  
5 305 other RHD follow-up studies – and may preclude more definite conclusions. Much higher  
6  
7 306 participation rates were seen in primary healthcare screening (84.4%<sup>5</sup>), suggesting this  
8  
9 307 location is more appropriate in our context. Second, in the absence of a gold standard,  
10  
11 308 prescription of penicillin for secondary prophylaxis was left to the discretion of the  
12  
13 309 treating physician. Low rates of prescription were seen compared to those reported  
14  
15 310 globally, suggesting the need for widespread provider education based on the results from  
16  
17 311 the GOAL study (*Gwoko Adunu pa Lutino*; clinicaltrials.gov No. NCT03346525).  
18  
19 312 Finally, no child progressed to clinically significant RHD, suggesting the timeline of  
20  
21 313 progression may be longer in the Brazilian context and not adequately captured by the  
22  
23 314 relatively short follow-up interval. This may have important implications on when to  
24  
25 315 screen and cost-effectiveness evaluations. Despite these limitations, the PROVAR+  
26  
27 316 program is the only longitudinal program evaluating the impact of echocardiographic  
28  
29 317 screening in Latin America.  
30  
31  
32  
33  
34  
35  
36  
37  
38  
39

### 319 **Conclusion:**

40 320 These data suggest that screen-detected RHD in Brazil is not benign; patients with  
41  
42 321 definite RHD are likely to remain in this category, and progression rates of borderline  
43  
44 322 RHD are not negligible. The simplified echocardiography score<sup>9</sup> assessed in an  
45  
46 323 independent population with predominantly low-risk for RHD progression was accurate  
47  
48 324 to predict early unfavorable outcome. Additional investigations are needed to establish  
49  
50 325 the long-term prognosis of subclinical RHD, and the effects of prophylaxis in high-risk  
51  
52 326 subgroups.  
53  
54  
55  
56  
57

### 58 328 **Conflicts of interest:**

59  
60



1  
2  
3 329 The authors have no conflicts of interest to declare regarding this manuscript.  
4  
5  
6 330

7  
8 331 **Author contributions:**  
9

10 332 Conception and design of the research: Bechtluft, BMF, Nascimento, BR, Sable,  
11  
12 333 C, Beaton, AZ, Nunes, MCP, Ribeiro, AL; Acquisition of data: Bechtluft, BMF, Fraga,  
13  
14 334 CL, Barbosa, MM, Reis, SDP, Meira, ZMA, Castilho, SRT, Arantes, NF, Oliveira, KKB,  
15  
16  
17 335 Diamantino, AC, Rezende, BDF, Costa, WAA, Mata, MDO, Pereira, AFC; Analysis and  
18  
19 336 interpretation of data: Nascimento, BR, Nunes, MCP, Sable, C, Beaton, AZ, Reis, SDP,  
20  
21 337 Meira, ZMA, Castilho, SRT, Arantes, NF; Statistical analysis: Silva, JLP, Nascimento,  
22  
23  
24 338 BR, Ribeiro, AL, Sable, C; Obtaining financing: Beaton, AZ, Sable, C, Nascimento, BR;  
25  
26 339 Writing of the manuscript: Bechtluft, BMF, Nascimento, BR, Sable, C, Nunes, MCP;  
27  
28 340 Critical revision of the manuscript for intellectual content: All authors; Authors  
29  
30 341 responsible for the overall content as guarantors: Bechtluft, BMF, Nascimento, BR,  
31  
32 342 Beaton, AZ, Ribeiro, AL, Sable, C, Nunes, MCP.  
33  
34

35 343

36  
37 344 **Funding:**  
38

39  
40 345 The PROVAR+ investigators would like to thank Edwards Lifesciences  
41  
42 346 Foundation® for supporting and funding the primary care screening program  
43  
44 347 (PROVAR+) in Brazil, General Electric Healthcare® for providing echocardiography  
45  
46 348 equipment and WiRed Health Resources for providing online curriculum on heart disease  
47  
48 349 and echocardiography. The Telehealth Network of Minas Gerais was funded by the State  
49  
50 350 Government of Minas Gerais, by its Health Department (Secretaria de Estado da Saúde  
51  
52 351 de Minas Gerais) and FAPEMIG (Fundação de Amparo à Pesquisa de Minas Gerais), and  
53  
54 352 by the Brazilian Government, including the Health Ministry and the Science and  
55  
56 353 Technology Ministry and its research and innovation agencies, CNPq (Conselho Nacional  
57  
58  
59  
60

1  
2  
3 354 de Desenvolvimento Científico e Tecnológico) e FINEP (Financiadora de Estudos e  
4  
5 355 Projetos). Dr. Ribeiro was supported in part by CNPq (Bolsa de produtividade em  
6  
7 356 pesquisa, 310679/2016-8) and by FAPEMIG (Programa Pesquisador Mineiro, PPM-  
8  
9 357 00428-17). Medical students received scholarships from the National Institute of Science  
10  
11 358 and Technology for Health Technology Assessment (IATS, project: 465518/2014-1).  
12  
13  
14  
15 359

16  
17 360 **Data sharing statement:**

18  
19 361 Data analytic methods and study materials will be made available to other  
20  
21 362 researchers for purposes of reproducing the results or replicating the procedure, from the  
22  
23 363 corresponding author upon reasonable request.  
24  
25  
26 364

27  
28 365 **References:**

- 29  
30 366  
31  
32  
33 367 1. Watkins DA, Johnson CO, Colquhoun SM, et al. Global, Regional, and National  
34  
35 368 Burden of Rheumatic Heart Disease, 1990-2015. *N Engl J Med* 2017;377(8):713-22. doi:  
36  
37 369 10.1056/NEJMoa1603693  
38  
39  
40 370 2. Disease GBD, Injury I, Prevalence C. Global, regional, and national incidence,  
41  
42 371 prevalence, and years lived with disability for 354 diseases and injuries for 195 countries  
43  
44 372 and territories, 1990-2017: a systematic analysis for the Global Burden of Disease Study  
45  
46 373 2017. *Lancet* 2018;392(10159):1789-858. doi: 10.1016/S0140-6736(18)32279-7  
47  
48  
49 374 3. Diamantino A, Beaton A, Aliku T, et al. A focussed single-view hand-held  
50  
51 375 echocardiography protocol for the detection of rheumatic heart disease. *Cardiology in the*  
52  
53 376 *young* 2018;28(1):108-17. doi: 10.1017/S1047951117001676  
54  
55  
56  
57  
58  
59  
60

- 1  
2  
3 377 4. Nascimento BR, Beaton AZ, Nunes MCP, et al. Echocardiographic Prevalence of  
4  
5 378 Rheumatic Heart Disease in Brazilian Schoolchildren: Data from the PROVAR Study.  
6  
7 379 *International Journal of Cardiology* 2016;219:439-45. doi: 10.1016/j.ijcard.2016.06.088  
8  
9  
10 380 5. Nascimento BR, Sable C, Nunes MCP, et al. Comparison Between Different Strategies  
11  
12 381 of Rheumatic Heart Disease Echocardiographic Screening in Brazil: Data From the  
13  
14 382 PROVAR (Rheumatic Valve Disease Screening Program) Study. *Journal of the*  
15  
16 383 *American Heart Association* 2018;7(4) doi: 10.1161/JAHA.117.008039  
17  
18 384 6. Beaton A, Aliku T, Okello E, et al. The utility of handheld echocardiography for early  
19  
20 385 diagnosis of rheumatic heart disease. *Journal of the American Society of*  
21  
22 386 *Echocardiography : official publication of the American Society of Echocardiography*  
23  
24 387 2014;27(1):42-9. doi: 10.1016/j.echo.2013.09.013 [published Online First: 2013/11/05]  
25  
26 388 7. Remenyi B, Wilson N, Steer A, et al. World Heart Federation criteria for  
27  
28 389 echocardiographic diagnosis of rheumatic heart disease--an evidence-based guideline.  
29  
30 390 *Nature reviews Cardiology* 2012;9(5):297-309. doi: 10.1038/nrcardio.2012.7 [published  
31  
32 391 Online First: 2012/03/01]  
33  
34 392 8. Zühlke L, Engel ME, Lemmer CE, et al. The natural history of latent rheumatic heart  
35  
36 393 disease in a 5 year follow-up study: a prospective observational study. *BMC Cardiovasc*  
37  
38 394 *Disord* 2016;16(46):1-6. [published Online First: 2016 Feb 19]  
39  
40 395 9. Nunes MCP, Sable C, Nascimento BR, et al. Simplified Echocardiography Screening  
41  
42 396 Criteria for Diagnosing and Predicting Progression of Latent Rheumatic Heart Disease.  
43  
44 397 *Circ Cardiovasc Imaging* 2019;12(2):e007928. doi:  
45  
46 398 10.1161/CIRCIMAGING.118.007928 [published Online First: 2019/02/02]  
47  
48 399 10. Santos J, Carmo G, Beaton AZ, et al. Challenges for the Implementation of the First  
49  
50 400 Large-Scale Rheumatic Heart Disease Screening Program in Brazil: The PROVAR Study  
51  
52 401 Experience. *Arq Bras Cardiol* 2017;108(4):370-74. doi: 10.5935/abc.20170047  
53  
54  
55  
56  
57  
58  
59  
60

- 1  
2  
3 402 11. Alkmim MB, Figueira RM, Marcolino MS, et al. Improving patient access to  
4  
5 403 specialized health care: the Telehealth Network of Minas Gerais, Brazil. *Bulletin of the*  
6  
7 404 *World Health Organization* 2012;90(5):373-8. doi: 10.2471/BLT.11.099408  
8  
9  
10 405 12. Lopes EL, Beaton AZ, Nascimento BR, et al. Telehealth solutions to enable global  
11  
12 406 collaboration in rheumatic heart disease screening. *J Telemed Telecare* 2016 doi:  
13  
14 407 10.1177/1357633X16677902  
15  
16  
17 408 13. Harris PA, Taylor R, Thielke R, et al. Research electronic data capture (REDCap)--a  
18  
19 409 metadata-driven methodology and workflow process for providing translational research  
20  
21 410 informatics support. *J Biomed Inform* 2009;42(2):377-81. doi: 10.1016/j.jbi.2008.08.010  
22  
23  
24 411 14. Beaton A, Nascimento BR, Diamantino AC, et al. Efficacy of a Standardized  
25  
26 412 Computer-Based Training Curriculum to Teach Echocardiographic Identification of  
27  
28 413 Rheumatic Heart Disease to Nonexpert Users. *Am J Cardiol* 2016 doi:  
29  
30 414 10.1016/j.amjcard.2016.03.006  
31  
32  
33 415 15. Kotit S, Said K, ElFaramawy A, et al. Prevalence and prognostic value of  
34  
35 416 echocardiographic screening for rheumatic heart disease. *Open Heart* 2017;4(2):e000702.  
36  
37 417 doi: 10.1136/openhrt-2017-000702 [published Online First: 2018/01/19]  
38  
39  
40 418 16. Beaton A, Aliku T, Dewyer A, et al. Latent Rheumatic Heart Disease: Identifying the  
41  
42 419 Children at Highest Risk of Unfavorable Outcome. *Circulation* 2017;136(23):2233-44.  
43  
44 420 doi: 10.1161/CIRCULATIONAHA.117.029936  
45  
46  
47 421 17. Engelman D, Wheaton GR, Mataika RL, et al. Screening-detected rheumatic heart  
48  
49 422 disease can progress to severe disease. *Heart Asia* 2016;8(2):67-73. doi:  
50  
51 423 10.1136/heartasia-2016-010847 [published Online First: 2016/12/10]  
52  
53  
54 424 18. Remond M, Atkinson D, White A, et al. Are minor echocardiographic changes  
55  
56 425 associated with an increased risk of acute rheumatic fever or progression to rheumatic  
57  
58  
59  
60

1  
2  
3 426 heart disease? *Int J Cardiol* 2015;198:117-22. doi: 10.1016/j.ijcard.2015.07.005

4  
5 427 [published Online First: 2015/07/15]

6  
7 428 19. Beaton A, Okello E, Aliku T, et al. Latent rheumatic heart disease: outcomes 2 years

8  
9 429 after echocardiographic detection. *Pediatr Cardiol* 2014;35(7):1259-67. doi:

10  
11 430 10.1007/s00246-014-0925-3

12  
13 431 20. Sanyahumbi A, Beaton A, Guffey D, et al. Two-year evolution of latent rheumatic

14  
15 432 heart disease in Malawi. *Congenit Heart Dis* 2019 doi: 10.1111/chd.12756 [published

16  
17 433 Online First: 2019/02/02]

18  
19  
20  
21  
22 434

23  
24  
25 435

26  
27 436

28  
29 437

30  
31 438

32  
33 439

34  
35 440

36  
37 441

38  
39 442

40  
41 443

42  
43 444

44  
45 445

46  
47 446

48  
49 447

50  
51 448

52  
53 449

54  
55 450

56  
57  
58  
59  
60

451

452

453 **Tables:**

454

455 **Table 1:** Baseline characteristics of patients with borderline and definite rheumatic heart  
 456 disease.

| Variable:                                                                             | Result:        |
|---------------------------------------------------------------------------------------|----------------|
| <b>Borderline RHD (N=170)</b>                                                         |                |
| Age (years), median (IQR)                                                             | 14 (11 – 16)   |
| Female gender, N (%)                                                                  | 111 (65.7)     |
| Follow-up period (months), mean $\pm$ SD                                              | 28.9 $\pm$ 9.0 |
| 1. At least two morphological features of RHD of the MV without pathological MR or MS | 1. 5 (2.9)     |
| 2. Pathological MR                                                                    | 2. 135 (79.4)  |
| 3. Pathological AR                                                                    | 3. 30 (17.6)   |
| <b>Definite RHD (N=27)</b>                                                            |                |
| Age (years), median (IQR)                                                             | 14.0 (12 – 16) |
| Female gender, N (%)                                                                  | 19 (70.4)      |
| Follow-up period (months), mean $\pm$ SD                                              | 29.5 $\pm$ 9.2 |
| 1. Pathological MR and at least two morphological features of RHD of the MV           | 1. 24 (88.9)   |
| 2. MS mean gradient $\geq$ 4 mmHg                                                     | 2. 0           |
| 3. Pathological AR and at least two morphological features of RHD of the AV           | 3. 0           |
| 4. Borderline disease of both the AV and MV                                           | 4. 3 (11.1)    |

457 **Abbreviations:** AV: aortic valve; AR: aortic regurgitation; IQR: interquartile range (Q1  
 458 – Q3); MR: mitral regurgitation; MS: mitral stenosis; MV: mitral valve; RHD: rheumatic  
 459 heart disease; SD: standard deviation.

460

461

462 **Table 2:** Baseline echocardiographic variables of patients with progression, stabilization

463 and regression of rheumatic heart disease at 2-year follow-up.

| Valve:                          | Variable:                                    | Progressed:<br>Borderline<br>Definite (N=29) | to<br>Remained<br>Definite (N=11) | Regressed /<br>stable<br>(borderline) /<br>other (N=156) |
|---------------------------------|----------------------------------------------|----------------------------------------------|-----------------------------------|----------------------------------------------------------|
| Mitral valve, N (%):            | Anterior leaflet thickening                  | 18 (62.1)                                    | 10 (90.9)                         | 103 (65.6)                                               |
|                                 | Chordal thickening                           | 0                                            | 2 (18.2)                          | 0                                                        |
|                                 | Restricted leaflet motion                    | 1 (3.4)                                      | 4 (36.4)                          | 4 (2.5)                                                  |
|                                 | Excessive leaflet tip motion                 | 2 (6.9)                                      | 6 (54.5)                          | 20 (12.7)                                                |
|                                 | Mitral stenosis                              | 0                                            | 0                                 | 0                                                        |
|                                 | Any regurgitation                            | 28 (96.6)                                    | 11 (100)                          | 141 (90.4)                                               |
|                                 | Regurgitation seen in 2 views                | 26 (89.7)                                    | 10 (90.9)                         | 141 (90.4)                                               |
|                                 | Jet length $\geq 2$ cm $\ddagger$            | 25 (86.2)                                    | 9 (81.8)                          | 116 (74.4)                                               |
|                                 | Velocity $\geq 3$ m/s for 1 envelope $\S$    | 9 (31.0)                                     | 4 (36.4)                          | 32 (20.5)                                                |
| Aortic valve, N (%):            | Pansystolic jet (color Doppler)              | 15 (51.7)                                    | 8 (72.7)                          | 99 (63.5)                                                |
|                                 | Irregular or focal thickening                | 0                                            | 2 (18.2)                          | 1 (0.6)                                                  |
|                                 | Coaptation defect                            | 0                                            | 1 (9.1)                           | 2 (1.3)                                                  |
|                                 | Restricted leaflet motion                    | 0                                            | 0                                 | 0                                                        |
|                                 | Leaflet Prolapse                             | 0                                            | 0                                 | 0                                                        |
|                                 | Any regurgitation                            | 2 (6.9)                                      | 3 (27.3)                          | 32 (20.5)                                                |
|                                 | Regurgitation seen in 2 views                | 2 (6.9)                                      | 2 (18.2)                          | 28 (17.9)                                                |
|                                 | Jet length $\geq 1$ cm $\ddagger$            | 1 (3.5)                                      | 3 (27.3)                          | 29 (18.6)                                                |
|                                 | Velocity $\geq 3$ m/s in early diastole $\S$ | 0                                            | 1 (9.1)                           | 6 (3.9)                                                  |
| Pandiatolic jet (color Doppler) | 0                                            | 2 (18.2)                                     | 20 (12.8)                         |                                                          |

464 **Abbreviations:** \*Congenital mitral valve or aortic valve abnormalities were465 excluded.  $\ddagger$ Abnormal thickening of the anterior mitral valve leaflet  $\geq 3$  or  $>4$  mm using

1  
2  
3 466 harmonic imaging. ‡In at least 1 view. §Measurements available with the Vivid-Q  
4  
5  
6 467 exams.

7  
8 468 **Figures legends:**

9  
10 469 **Figure 1:** RHD progression during the follow-up according to diagnosis at baseline.

11  
12 470 **Figure 2:** Cumulative incidence of disease unfavorable outcome in children with  
13  
14 471 echocardiography-detected RHD according to according to risk categories of the  
15  
16  
17 472 simplified score.

18  
19  
20 473

21  
22 474 **Appendix Figure 1:** Receiver operator characteristic curve for echocardiography score  
23  
24 475 showing predicted probability from the model (C-statistic of 0.71).

25  
26 476 **Appendix Figure 2:** (A) Calibration plots by quintiles for RHD progression risk  
27  
28 477 prediction model in the validation cohort. (B) Calibration plots by quintiles for favorable  
29  
30 478 outcome RHD risk prediction model in the validation cohort.



1  
2  
3  
4  
5  
6  
7  
8  
9  
10  
11  
12  
13  
14  
15  
16  
17  
18  
19  
20  
21  
22  
23  
24  
25  
26  
27  
28  
29  
30  
31  
32  
33  
34  
35  
36  
37  
38  
39  
40  
41  
42  
43  
44  
45  
46  
47  
48  
49  
50  
51  
52  
53  
54  
55  
56  
57  
58  
59  
60

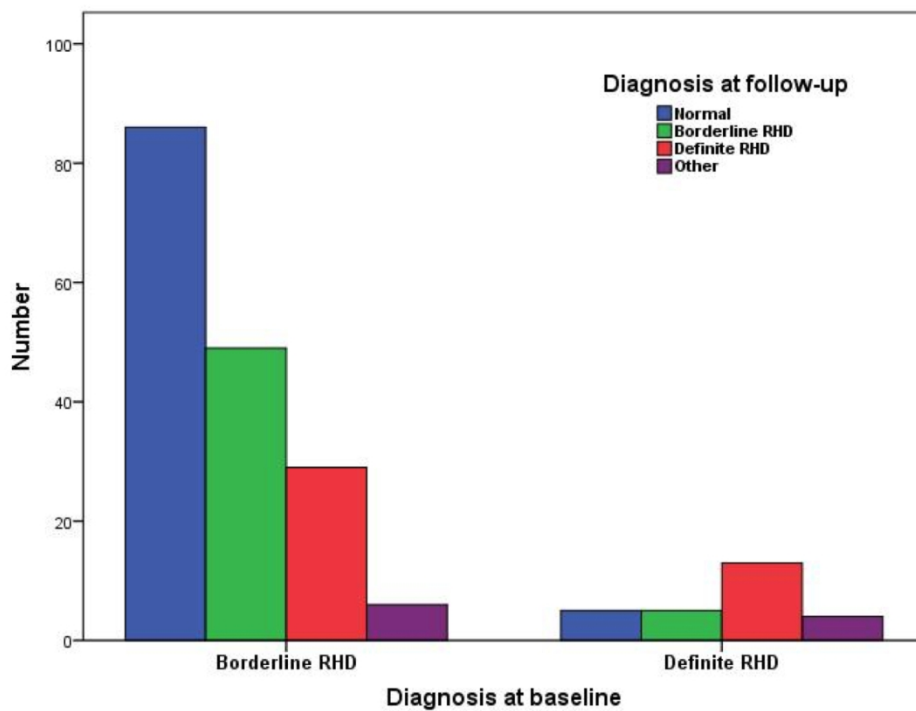

RHD progression during the follow-up according to diagnosis at baseline.

69x51mm (600 x 600 DPI)

1  
2  
3  
4  
5  
6  
7  
8  
9  
10  
11  
12  
13  
14  
15  
16  
17  
18  
19  
20  
21  
22  
23  
24  
25  
26  
27  
28  
29  
30  
31  
32  
33  
34  
35  
36  
37  
38  
39  
40  
41  
42  
43  
44  
45  
46  
47  
48  
49  
50  
51  
52  
53  
54  
55  
56  
57  
58  
59  
60

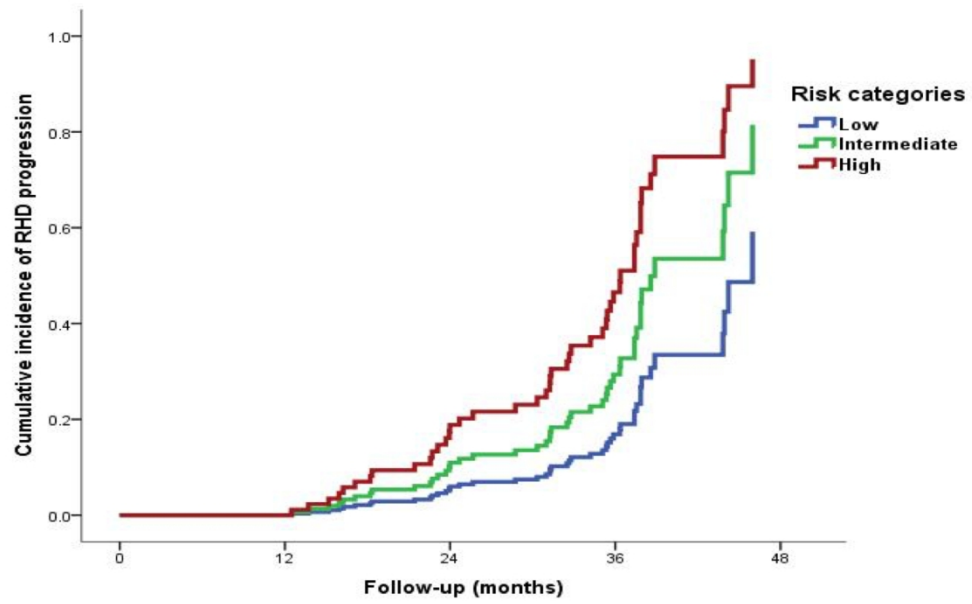

Cumulative incidence of disease unfavorable outcome in children with echocardiography-detected RHD according to according to risk categories of the simplified score.

78x52mm (600 x 600 DPI)

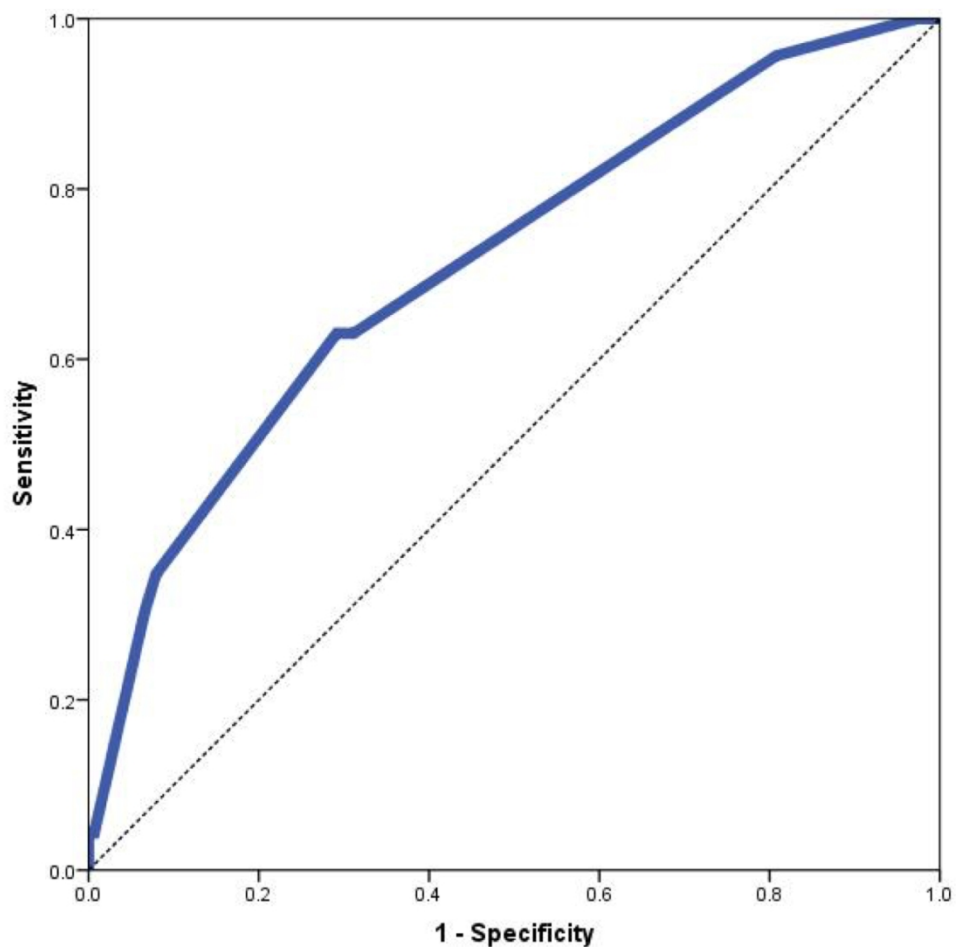

57x56mm (600 x 600 DPI)

1  
2  
3  
4  
5  
6  
7  
8  
9  
10  
11  
12  
13  
14  
15  
16  
17  
18  
19  
20  
21  
22  
23  
24  
25  
26  
27  
28  
29  
30  
31  
32  
33  
34  
35  
36  
37  
38  
39  
40  
41  
42  
43  
44  
45  
46  
47  
48  
49  
50  
51  
52  
53  
54  
55  
56  
57  
58  
59  
60

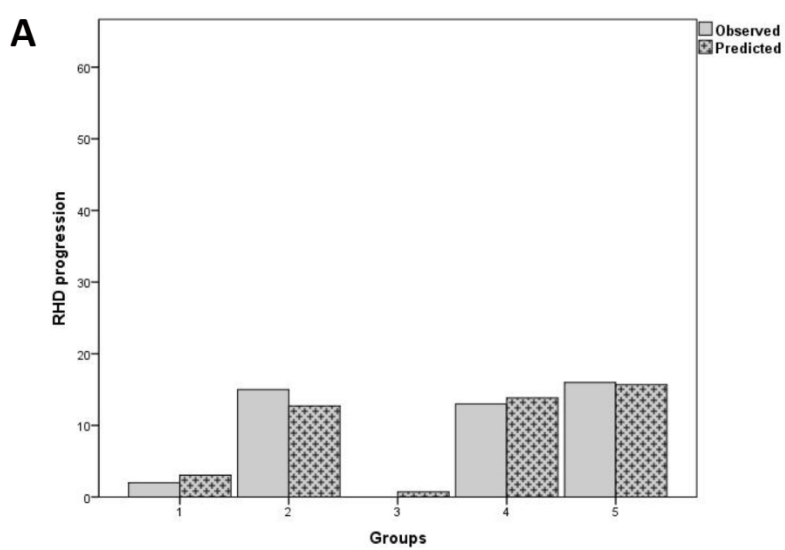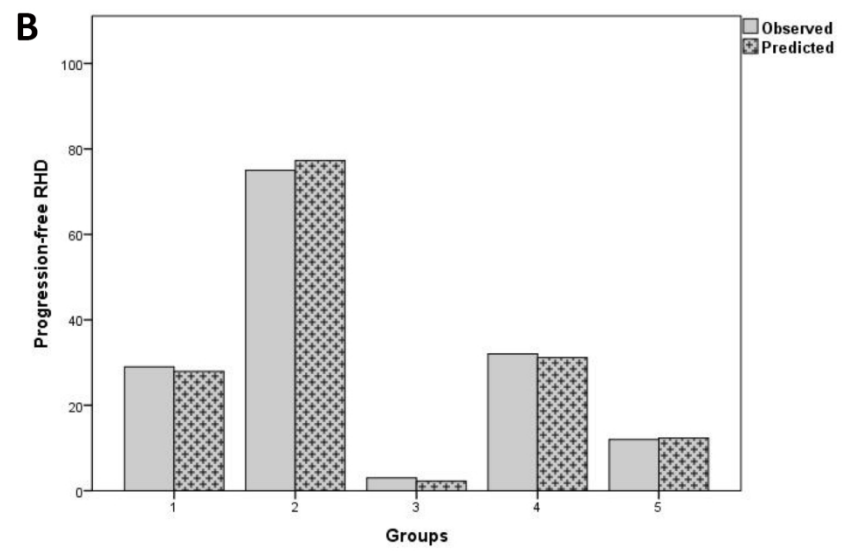

69x97mm (600 x 600 DPI)

# Reporting checklist for prediction model development and validation study.

Based on the TRIPOD guidelines.

## Instructions to authors

Complete this checklist by entering the page numbers from your manuscript where readers will find each of the items listed below.

Your article may not currently address all the items on the checklist. Please modify your text to include the missing information. If you are certain that an item does not apply, please write "n/a" and provide a short explanation.

Upload your completed checklist as an extra file when you submit to a journal.

In your methods section, say that you used the TRIPOD reporting guidelines, and cite them as:

Collins GS, Reitsma JB, Altman DG, Moons KG. Transparent reporting of a multivariable prediction model for individual prognosis or diagnosis (TRIPOD): The TRIPOD statement.

|                     | Reporting Item                                                                                                                                                                                                       | Page Number |
|---------------------|----------------------------------------------------------------------------------------------------------------------------------------------------------------------------------------------------------------------|-------------|
| <b>Title</b>        |                                                                                                                                                                                                                      |             |
|                     | <a href="#">#1</a> Identify the study as developing and / or validating a multivariable prediction model, the target population, and the outcome to be predicted.                                                    | 1           |
| <b>Abstract</b>     |                                                                                                                                                                                                                      |             |
|                     | <a href="#">#2</a> Provide a summary of objectives, study design, setting, participants, sample size, predictors, outcome, statistical analysis, results, and conclusions.                                           | 2           |
| <b>Introduction</b> |                                                                                                                                                                                                                      |             |
|                     | <a href="#">#3a</a> Explain the medical context (including whether diagnostic or prognostic) and rationale for developing or validating the multivariable prediction model, including references to existing models. | 1, 2        |
|                     | <a href="#">#3b</a> Specify the objectives, including whether the study describes the                                                                                                                                | 2           |

development or validation of the model or both.

## Methods

|    |                              |                      |                                                                                                                                                                         |
|----|------------------------------|----------------------|-------------------------------------------------------------------------------------------------------------------------------------------------------------------------|
| 1  |                              |                      |                                                                                                                                                                         |
| 2  |                              |                      |                                                                                                                                                                         |
| 3  | <b>Methods</b>               |                      |                                                                                                                                                                         |
| 4  |                              |                      |                                                                                                                                                                         |
| 5  | Source of data               | <a href="#">#4a</a>  | Describe the study design or source of data (e.g., randomized trial, cohort, or registry data), separately for the development and validation data sets, if applicable. |
| 6  |                              |                      | 6, 7                                                                                                                                                                    |
| 7  |                              |                      |                                                                                                                                                                         |
| 8  |                              |                      |                                                                                                                                                                         |
| 9  |                              |                      |                                                                                                                                                                         |
| 10 | Source of data               | <a href="#">#4b</a>  | Specify the key study dates, including start of accrual; end of accrual; and, if applicable, end of follow-up.                                                          |
| 11 |                              |                      | 7,8                                                                                                                                                                     |
| 12 |                              |                      |                                                                                                                                                                         |
| 13 |                              |                      |                                                                                                                                                                         |
| 14 | Participants                 | <a href="#">#5a</a>  | Specify key elements of the study setting (e.g., primary care, secondary care, general population) including number and location of centres.                            |
| 15 |                              |                      | 6, 7                                                                                                                                                                    |
| 16 |                              |                      |                                                                                                                                                                         |
| 17 |                              |                      |                                                                                                                                                                         |
| 18 | Participants                 | <a href="#">#5b</a>  | Describe eligibility criteria for participants.                                                                                                                         |
| 19 |                              |                      | 6                                                                                                                                                                       |
| 20 | Participants                 | <a href="#">#5c</a>  | Give details of treatments received, if relevant                                                                                                                        |
| 21 |                              |                      | 7                                                                                                                                                                       |
| 22 |                              |                      |                                                                                                                                                                         |
| 23 | Outcome                      | <a href="#">#6a</a>  | Clearly define the outcome that is predicted by the prediction model, including how and when assessed.                                                                  |
| 24 |                              |                      | 8                                                                                                                                                                       |
| 25 |                              |                      |                                                                                                                                                                         |
| 26 | Outcome                      | <a href="#">#6b</a>  | Report any actions to blind assessment of the outcome to be predicted.                                                                                                  |
| 27 |                              |                      | N/A                                                                                                                                                                     |
| 28 |                              |                      |                                                                                                                                                                         |
| 29 | Predictors                   | <a href="#">#7a</a>  | Clearly define all predictors used in developing or validating the multivariable prediction model, including how and when they were measured                            |
| 30 |                              |                      | 7, 8                                                                                                                                                                    |
| 31 |                              |                      |                                                                                                                                                                         |
| 32 |                              |                      |                                                                                                                                                                         |
| 33 |                              |                      |                                                                                                                                                                         |
| 34 | Predictors                   | <a href="#">#7b</a>  | Report any actions to blind assessment of predictors for the outcome and other predictors.                                                                              |
| 35 |                              |                      | N/A                                                                                                                                                                     |
| 36 |                              |                      |                                                                                                                                                                         |
| 37 |                              |                      |                                                                                                                                                                         |
| 38 | Sample size                  | <a href="#">#8</a>   | Explain how the study size was arrived at.                                                                                                                              |
| 39 |                              |                      | 9                                                                                                                                                                       |
| 40 | Missing data                 | <a href="#">#9</a>   | Describe how missing data were handled (e.g., complete-case analysis, single imputation, multiple imputation) with details of any imputation method.                    |
| 41 |                              |                      | N/A                                                                                                                                                                     |
| 42 |                              |                      |                                                                                                                                                                         |
| 43 |                              |                      |                                                                                                                                                                         |
| 44 |                              |                      |                                                                                                                                                                         |
| 45 | Statistical analysis methods | <a href="#">#10a</a> | If you are developing a prediction model describe how predictors were handled in the analyses.                                                                          |
| 46 |                              |                      | 8                                                                                                                                                                       |
| 47 |                              |                      |                                                                                                                                                                         |
| 48 |                              |                      |                                                                                                                                                                         |
| 49 | Statistical analysis methods | <a href="#">#10b</a> | If you are developing a prediction model, specify type of model, all model-building procedures (including any predictor selection), and method for internal validation. |
| 50 |                              |                      | 8                                                                                                                                                                       |
| 51 |                              |                      |                                                                                                                                                                         |
| 52 |                              |                      |                                                                                                                                                                         |
| 53 |                              |                      |                                                                                                                                                                         |
| 54 | Statistical analysis methods | <a href="#">#10c</a> | If you are validating a prediction model, describe how the predictions were calculated.                                                                                 |
| 55 |                              |                      | 8                                                                                                                                                                       |
| 56 |                              |                      |                                                                                                                                                                         |
| 57 |                              |                      |                                                                                                                                                                         |
| 58 | Statistical analysis         | <a href="#">#10d</a> | Specify all measures used to assess model performance and, if relevant,                                                                                                 |
| 59 |                              |                      | N/A                                                                                                                                                                     |

|    |                      |                                                                                                                                                                                                            |        |
|----|----------------------|------------------------------------------------------------------------------------------------------------------------------------------------------------------------------------------------------------|--------|
| 1  | methods              | to compare multiple models.                                                                                                                                                                                |        |
| 2  | Statistical analysis | #10e If you are validating a prediction model, describe any model updating (e.g., recalibration) arising from the validation, if done                                                                      | N/A    |
| 3  | methods              |                                                                                                                                                                                                            |        |
| 4  |                      |                                                                                                                                                                                                            |        |
| 5  |                      |                                                                                                                                                                                                            |        |
| 6  | Risk groups          | #11 Provide details on how risk groups were created, if done.                                                                                                                                              | N/A    |
| 7  |                      |                                                                                                                                                                                                            |        |
| 8  | Development vs.      | #12 For validation, identify any differences from the development data in setting, eligibility criteria, outcome, and predictors.                                                                          | 8      |
| 9  | validation           |                                                                                                                                                                                                            |        |
| 10 |                      |                                                                                                                                                                                                            |        |
| 11 |                      |                                                                                                                                                                                                            |        |
| 12 | <b>Results</b>       |                                                                                                                                                                                                            |        |
| 13 |                      |                                                                                                                                                                                                            |        |
| 14 |                      |                                                                                                                                                                                                            |        |
| 15 | Participants         | #13a Describe the flow of participants through the study, including the number of participants with and without the outcome and, if applicable, a summary of the follow-up time. A diagram may be helpful. | 9,10   |
| 16 |                      |                                                                                                                                                                                                            |        |
| 17 |                      |                                                                                                                                                                                                            |        |
| 18 |                      |                                                                                                                                                                                                            |        |
| 19 |                      |                                                                                                                                                                                                            |        |
| 20 | Participants         | #13b Describe the characteristics of the participants (basic demographics, clinical features, available predictors), including the number of participants with missing data for predictors and outcome.    | 9      |
| 21 |                      |                                                                                                                                                                                                            |        |
| 22 |                      |                                                                                                                                                                                                            |        |
| 23 |                      |                                                                                                                                                                                                            |        |
| 24 |                      |                                                                                                                                                                                                            |        |
| 25 | Participants         | #13c For validation, show a comparison with the development data of the distribution of important variables (demographics, predictors and outcome).                                                        | 9, 10  |
| 26 |                      |                                                                                                                                                                                                            |        |
| 27 |                      |                                                                                                                                                                                                            |        |
| 28 |                      |                                                                                                                                                                                                            |        |
| 29 |                      |                                                                                                                                                                                                            |        |
| 30 |                      |                                                                                                                                                                                                            |        |
| 31 | Model                | #14a If developing a model, specify the number of participants and outcome events in each analysis.                                                                                                        | 10     |
| 32 | development          |                                                                                                                                                                                                            |        |
| 33 |                      |                                                                                                                                                                                                            |        |
| 34 | Model                | #14b If developing a model, report the unadjusted association, if calculated between each candidate predictor and outcome.                                                                                 | N/A    |
| 35 | development          |                                                                                                                                                                                                            |        |
| 36 |                      |                                                                                                                                                                                                            |        |
| 37 |                      |                                                                                                                                                                                                            |        |
| 38 | Model                | #15a If developing a model, present the full prediction model to allow predictions for individuals (i.e., all regression coefficients, and model intercept or baseline survival at a given time point).    | 9, 10  |
| 39 | specification        |                                                                                                                                                                                                            |        |
| 40 |                      |                                                                                                                                                                                                            |        |
| 41 |                      |                                                                                                                                                                                                            |        |
| 42 |                      |                                                                                                                                                                                                            |        |
| 43 | Model                | #15b If developing a prediction model, explain how to use it.                                                                                                                                              | 10     |
| 44 | specification        |                                                                                                                                                                                                            |        |
| 45 |                      |                                                                                                                                                                                                            |        |
| 46 |                      |                                                                                                                                                                                                            |        |
| 47 | Model                | #16 Report performance measures (with CIs) for the prediction model.                                                                                                                                       | 10     |
| 48 | performance          |                                                                                                                                                                                                            |        |
| 49 |                      |                                                                                                                                                                                                            |        |
| 50 |                      |                                                                                                                                                                                                            |        |
| 51 | Model-updating       | #17 If validating a model, report the results from any model updating, if done (i.e., model specification, model performance).                                                                             | N/A    |
| 52 |                      |                                                                                                                                                                                                            |        |
| 53 |                      |                                                                                                                                                                                                            |        |
| 54 |                      |                                                                                                                                                                                                            |        |
| 55 | <b>Discussion</b>    |                                                                                                                                                                                                            |        |
| 56 |                      |                                                                                                                                                                                                            |        |
| 57 | Limitations          | #18 Discuss any limitations of the study (such as nonrepresentative sample,                                                                                                                                | 12, 13 |
| 58 |                      |                                                                                                                                                                                                            |        |
| 59 |                      |                                                                                                                                                                                                            |        |
| 60 |                      |                                                                                                                                                                                                            |        |

few events per predictor, missing data).

|    |                    |                      |                                                                                                                                                        |
|----|--------------------|----------------------|--------------------------------------------------------------------------------------------------------------------------------------------------------|
| 1  |                    |                      |                                                                                                                                                        |
| 2  |                    |                      |                                                                                                                                                        |
| 3  | Interpretation     | <a href="#">#19a</a> | For validation, discuss the results with reference to performance in the development data, and any other validation data 12                            |
| 4  |                    |                      |                                                                                                                                                        |
| 5  |                    |                      |                                                                                                                                                        |
| 6  | Interpretation     | <a href="#">#19b</a> | Give an overall interpretation of the results, considering objectives, limitations, results from similar studies, and other relevant evidence. 11 - 13 |
| 7  |                    |                      |                                                                                                                                                        |
| 8  |                    |                      |                                                                                                                                                        |
| 9  |                    |                      |                                                                                                                                                        |
| 10 | Implications       | <a href="#">#20</a>  | Discuss the potential clinical use of the model and implications for future research 12                                                                |
| 11 |                    |                      |                                                                                                                                                        |
| 12 |                    |                      |                                                                                                                                                        |
| 13 |                    |                      |                                                                                                                                                        |
| 14 | <b>Other</b>       |                      |                                                                                                                                                        |
| 15 | <b>information</b> |                      |                                                                                                                                                        |
| 16 |                    |                      |                                                                                                                                                        |
| 17 |                    |                      |                                                                                                                                                        |
| 18 | Supplementary      | <a href="#">#21</a>  | Provide information about the availability of supplementary resources, such as study protocol, Web calculator, and data sets. 20                       |
| 19 | information        |                      |                                                                                                                                                        |
| 20 |                    |                      |                                                                                                                                                        |
| 21 | Funding            | <a href="#">#22</a>  | Give the source of funding and the role of the funders for the present study. 14                                                                       |
| 22 |                    |                      |                                                                                                                                                        |
| 23 |                    |                      |                                                                                                                                                        |
| 24 |                    |                      |                                                                                                                                                        |

25 The TRIPOD checklist is distributed under the terms of the Creative Commons Attribution License CC-BY.  
 26 This checklist was completed on 03. January 2020 using <https://www.goodreports.org/>, a tool made by the  
 27 EQUATOR Network in collaboration with [Penelope.ai](http://penelope.ai)  
 28  
 29  
 30  
 31  
 32  
 33  
 34  
 35  
 36  
 37  
 38  
 39  
 40  
 41  
 42  
 43  
 44  
 45  
 46  
 47  
 48  
 49  
 50  
 51  
 52  
 53  
 54  
 55  
 56  
 57  
 58  
 59  
 60
