# Supplementary figures and images for: Validation of a simplified score for predicting latent rheumatic heart disease progression using a prospective cohort of Brazilian schoolchildren
Source: PubMed Central journal article supplement — BMJ Open. 2020 May 10;10(5):e036827. doi: 10.1136/bmjopen-2020-036827 (PMC7223287; doi:10.1136/bmjopen-2020-036827), 2020-05-10

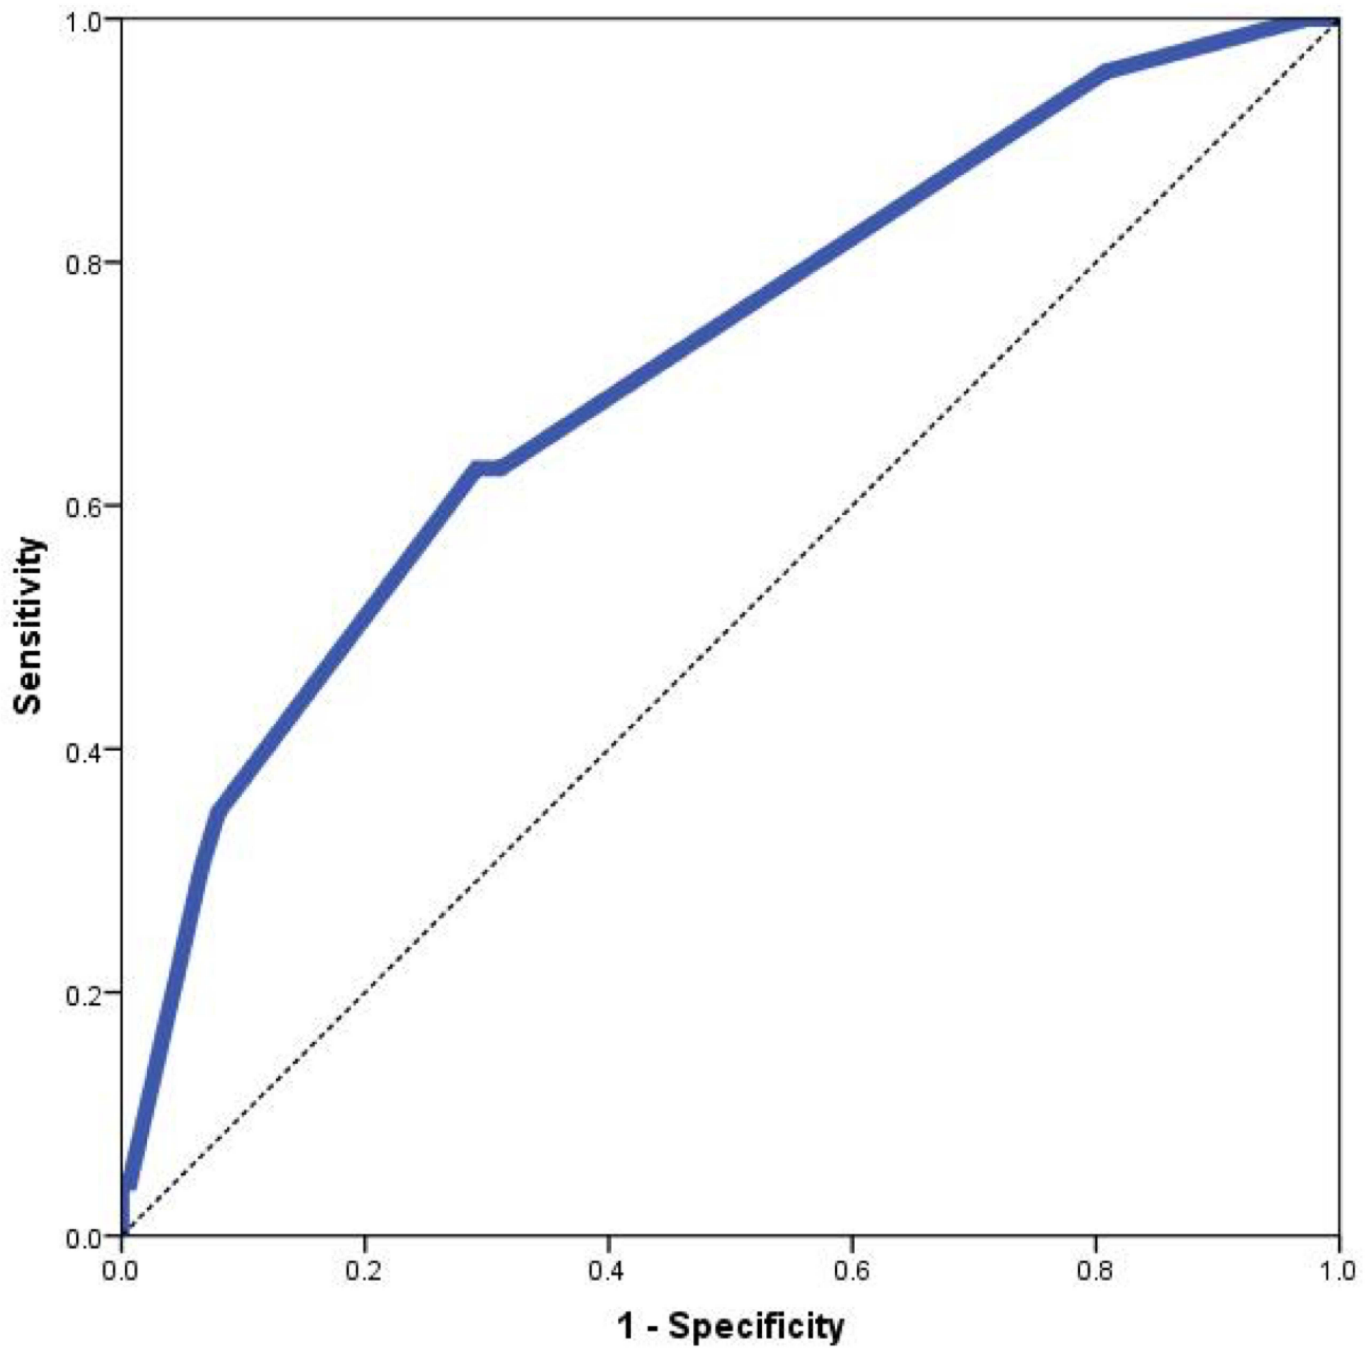

Supplement: bmjopen-2020-036827supp001.pdf [file bmjopen-2020-036827supp001.pdf]

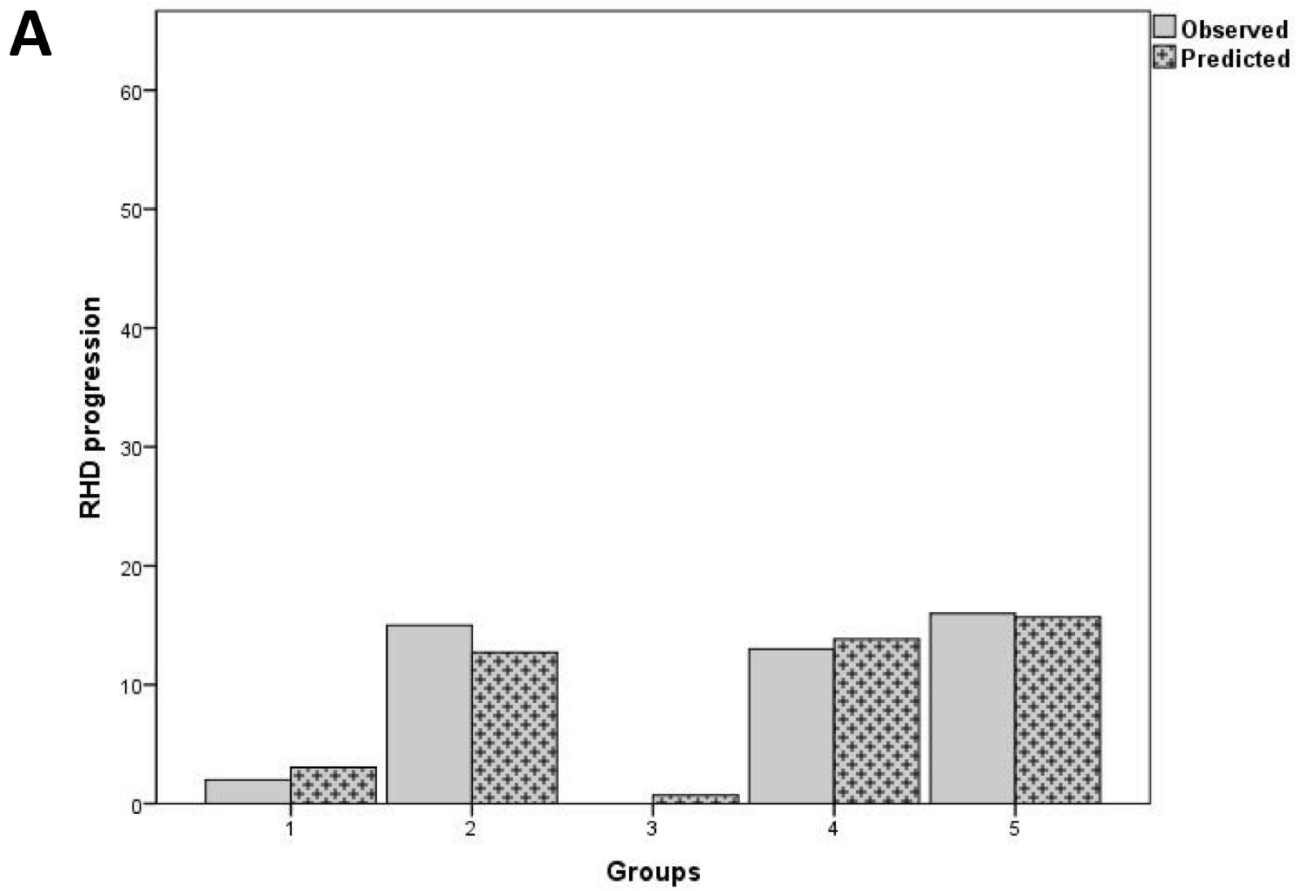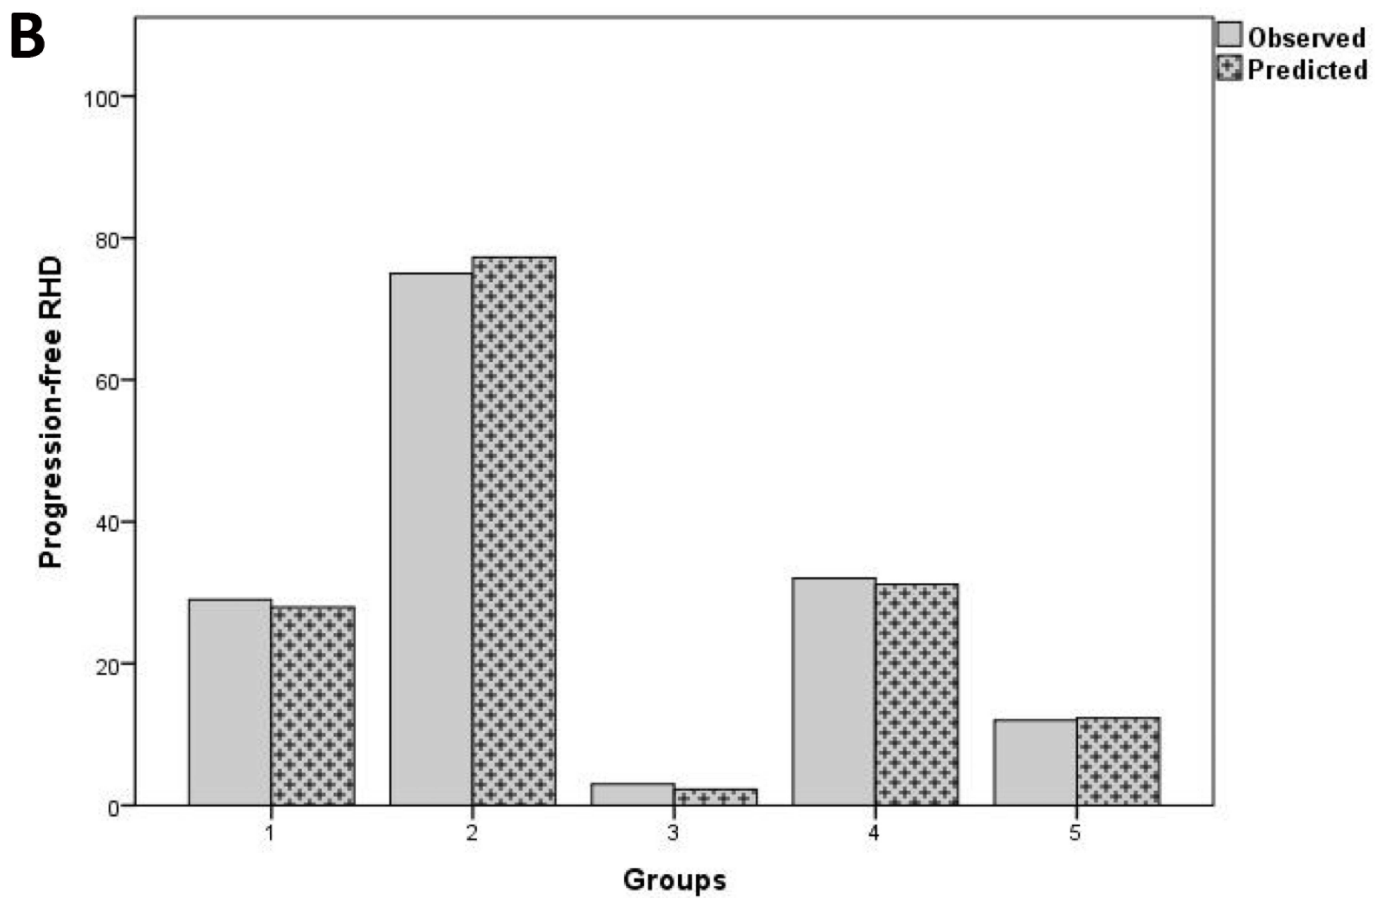

Supplement: bmjopen-2020-036827supp002.pdf [file bmjopen-2020-036827supp002.pdf]
